# 1 Domestication of different varieties in 2 the cheese-making fungus *Geotrichum* 3 *candidum*

4 Bastien Bennetot<sup>1</sup>, Jean-Philippe Vernadet<sup>1</sup>, Vincent Perkins<sup>2</sup>, Sophie Hautefeuille<sup>1</sup>,  
5 Ricardo C. Rodríguez de la Vega<sup>1</sup>, Samuel O'Donnell<sup>1</sup>, Alodie Snirc<sup>1</sup>, Cécile  
6 Grondin<sup>2</sup>, Marie-Hélène Lessard<sup>3</sup>, Anne-Claire Peron<sup>4</sup>, Steve Labrie<sup>3</sup>, Sophie  
7 Landaud<sup>4</sup>, Tatiana Giraud<sup>1</sup>, Jeanne Ropars<sup>1</sup>

8  
9 <sup>1</sup>Laboratoire Ecologie Systématique et Evolution, Université Paris-Saclay, CNRS,  
10 AgroParisTech, site IDEEV, Gif-sur-Yvette, France

11 <sup>2</sup>SPO, Univ Montpellier, INRAE, Institut Agro, Montpellier, France

12 <sup>3</sup>Département de sciences des aliments et de nutrition, Université Laval, Québec,  
13 Canada

14 <sup>4</sup>UMR SayFood, Université Paris-Saclay, INRAe, AgroParisTech, Thiverval Grignon,  
15 France

16  
17 Keywords: domestication, adaptive divergence, lipolysis, proteolysis, genomics,  
18 volatiles, laboratory experiments, *Galactomyces candidus*

19

## 20 Abstract

21 Domestication is an excellent model for studying adaptation processes, involving  
22 recent adaptation and diversification, convergence following adaptation to similar  
23 conditions, as well as degeneration of unused functions. *Geotrichum candidum* is a  
24 fungus used for cheese-making and is also found in other environments such as soil  
25 and plants. By analyzing whole-genome data from 98 strains, we found that all  
26 strains isolated from cheese formed a monophyletic clade. Within the cheese clade,  
27 we identified three differentiated populations and we detected footprints of  
28 recombination and admixture. The genetic diversity in the cheese clade was high,  
29 indicating a lack of strong bottleneck. Commercial starter strains were scattered  
30 across the cheese clade, thus not constituting a single clonal lineage. The cheese  
31 populations were phenotypically differentiated from other populations, with a slower  
32 growth on all media, even cheese, a prominent production of attractive cheese  
33 flavors and a lower proteolytic activity. Furthermore, one of the cheese populations  
34 displayed footprints of a more advanced state of domestication, with much lower  
35 genetic diversity, denser and fluffier colonies and excluding more efficiently cheese

36 spoiler fungi. Cheese populations lost two beta lactamase-like genes, involved in  
37 xenobiotic clearance, and displayed transposable element expansion, likely due to  
38 relaxed selection. Our findings suggest the existence of genuine domestication in *G.*  
39 *candidum*, which led to diversification into different varieties with contrasted  
40 phenotypes. Some of the traits acquired by cheese strains indicate convergence with  
41 other, distantly related fungi used for cheese maturation.

42

## 43 Introduction

44 Understanding how populations adapt to their environment is a key question in  
45 evolutionary biology. Domestication, the change in the genetic and phenotypic make-  
46 up of populations under human artificial selection, is an excellent model for studying  
47 adaptation processes, as it involves recent adaptation events under strong selection  
48 on known traits and rapid diversification. Numerous studies have documented the  
49 specific traits acquired in domesticated animals (dog, horse, pig, cow) (Diamond,  
50 2002; Frantz et al., 2015; Petersen et al., 2013; Warmuth et al., 2011) and plants  
51 (cabbage, corn, wheat) (Hufford et al., 2012; Mabry et al., 2021; Peng et al., 2011),  
52 as well as their genetic differentiation from wild populations and their adaptive  
53 genomic changes. For example, domesticated animals (dog, horse and cattle) have  
54 been selected for coat color, size, rapidity and docility (Liu et al., 2022; Plassais et  
55 al., 2022; Qanbari et al., 2014). In plants too, similar traits have been selected in  
56 different lineages, such as bigger grains with more nutrients and lack of dormancy  
57 (Cornille et al., 2014; Hufford et al., 2012; Peng et al., 2011; Purugganan, 2019). On  
58 the other hand, functions essential in wild environments but unused in anthropic  
59 environments have often degenerated due to relaxed selection, for example,  
60 reductions in defense mechanisms in plants (Cornille et al., 2014; Hufford et al.,  
61 2012). Domestication also often leads to strong reduction in genetic diversity due to  
62 bottlenecks in animals (e.g. dog) (Marsden et al., 2016) and annual plants (e.g. rice)  
63 (Zhu et al., 2007).

64 Humans have domesticated several fungi for the fermentation of foods (e.g. beer,  
65 bread, wine, dry-cured meat and cheese), to produce secondary metabolites used in  
66 pharmaceuticals (e.g. penicillin), or for their nutritional and gustatory values (e.g.  
67 button and shiitake mushrooms) (Steensels et al., 2021). Fungi are excellent models

68 for studying evolution and adaptation in eukaryotes, given their many experimental  
69 assets (Gladieux et al., 2014): fungi have relatively small genomes, many are easy  
70 to culture in laboratory conditions, and spores can survive long periods in the  
71 freezer. However, despite their economic and industrial importance, and their utility  
72 as biological models for studying adaptive divergence, the fungi used by humans  
73 have yet been little studied. An exception is the budding yeast *Saccharomyces*  
74 *cerevisiae* used in the production of beer, wine and bread (Bai et al., 2022; Duan et  
75 al., 2018; Fay and Benavides, 2005; Gallone et al., 2016; Lahue et al., 2020; Legras  
76 et al., 2018; Libkind et al., 2011; Liti et al., 2009; Peter et al., 2018), and to a lesser  
77 extent the filamentous fungus *Aspergillus oryzae* used to ferment soy and rice  
78 products in Asia (Galagan et al., 2005; Gibbons et al., 2012; Machida et al., 2005)  
79 and the *Penicillium* species used for cheese ripening, e.g. *P. camemberti* for soft  
80 cheeses (Ropars et al., 2020), and *P. roqueforti* for blue cheeses (Cheeseman et al.,  
81 2014; Dumas et al., 2020; Ropars et al., 2015). Phenotypic traits beneficial for food  
82 production have been acquired in fungal domesticated populations, being different  
83 from wild populations. The domestication having led to *P. camemberti* occurred in  
84 several steps, with the successive differentiation of several lineages displaying  
85 decreasing diversity and increasing beneficial traits for cheese maturation, from the  
86 wild *P. fuscoglaucum*, to *P. bifforme* and then the two clonal *P. camemberti* varieties,  
87 *caseifulvum* and *camemberti* (Ropars et al., 2020b). Domesticated populations of  
88 fermented food microorganisms can for example better assimilate the carbon  
89 sources present in the anthropic environment, e.g. lactose for *Penicillium* cheese  
90 fungi (Ropars et al., 2015) and maltose for *S. cerevisiae* sourdough strains (Bigey et  
91 al., 2021). Furthermore, volatile organic compounds crucial for cheese flavor are  
92 more appealing in cheese populations compared to wild populations in *P. roqueforti*  
93 (Caron et al., 2021).

94 The genomic processes involved in adaptation to human-made environments in  
95 domesticated fungi include gene family expansion for specific metabolism pathways,  
96 gene gain, inter-specific hybridization, introgression and horizontal gene transfer  
97 (Almeida et al., 2014; Barros Lopes et al., 2002; Borneman et al., 2016; Cheeseman  
98 et al., 2014; Gallone et al., 2016; Libkind et al., 2011; Machida et al., 2005; Naumova  
99 et al., 2005; Novo et al., 2009; Ropars et al., 2015). Domesticated fungi also have  
100 lost parts of genes no longer useful in the food environment; for example a cheese  
101 *P. roqueforti* population and *P. camemberti* var. *caseifulvum* are no longer able to

102 produce some of their toxins due to deletions in the corresponding genes (Gillot et  
103 al., 2017; Ropars et al., 2020b). Such losses are likely due to relaxed selection in  
104 terms of competition ability in cheese, in which desired fungi are often inoculated in  
105 large quantities compared to possible competitors. Bottlenecks and degeneration  
106 have also been documented in domesticated fungi, with reduced fertility and genetic  
107 diversity in the cheese fungi *P. roqueforti* and *P. camemberti* (Dumas et al., 2020;  
108 Ropars et al., 2020b).

109 While several cheese-making fungi have been studied recently, it is important to add  
110 study cases in additional lineages, as it allows addressing the question of whether  
111 adaptation to a similar medium leads to convergent traits. In the case of cheese-  
112 making fungi, one can expect convergence for example for more or less rapid growth  
113 on cheese, higher proteolysis and lipolysis abilities, higher competitive abilities and  
114 greater production of positive volatile compounds (Ropars et al., 2020a, 2020b).  
115 *Geotrichum candidum* (teleomorph *Galactomyces candidus*) is a dimorphic fungus  
116 (i.e., able to grow as a yeast or a mycelial form), commonly used for cheese-making,  
117 but also thriving in other environments such as soil, plants and fruits. *Geotrichum*  
118 *candidum* is naturally present in raw milk and is also often added as a starter culture  
119 for the production of semi-hard, mold-ripened, smeared soft cheeses, fresh goat and  
120 ewe cheeses. Analyses based on genetic markers have revealed genetic  
121 differentiation between cheese and wild strains (Alper et al., 2013; Jacques et al.,  
122 2017; Perkins et al., 2020; Tinsley et al., 2022). Phenotypic diversity within *G.*  
123 *candidum* has been reported in terms of carbon and nitrogen assimilation, lipolysis  
124 and proteolysis (Boutrou and Gueguen, 2005; Perkins et al., 2020). However, it has  
125 not been tested whether *G. candidum* cheese populations have evolved specific  
126 traits that could be beneficial for cheese-making.

127

128 By analyzing the genomes of 98 strains isolated from different kinds of cheeses and  
129 other environments, we confirmed the genetic differentiation between cheese and  
130 wild strains. Within the cheese clade, we identified three differentiated cheese  
131 populations, including one with all goat cheese strains, as well as footprints of  
132 recombination and admixture. The genetic diversity in the cheese clade remained  
133 high indicating a lack of strong bottlenecks. Commercial strains were scattered within  
134 the cheese clade, some corresponding to hybrid strains. We found phenotypic  
135 differentiation between cheese and wild populations, and between cheese

136 populations, in terms of growth, proteolysis and volatile compounds. We revealed the  
137 loss, in the cheese clade, of two tandem beta lactamase-like genes involved in  
138 xenobiotic clearance. Altogether our findings suggest the existence of genuine  
139 domestication in *G. candidum*, resulting in both the genetic and phenotypic  
140 differentiation of cheese strains from their wild counterparts, and their convergence  
141 with other domesticated cheese fungi. We also found diversification within the  
142 cheese clade, with three genetic clusters with contrasted traits and levels of diversity.  
143

## 144 Results

### 145 Genetic differentiation between wild and cheese strains in 146 *Geotrichum candidum*

147 We collected and sequenced the genomes of 88 *G. candidum* strains with Illumina  
148 technology and included in our analyses ten available genomes (Illumina and  
149 PacBio) (Perkins et al., 2020). Our dataset included 61 strains isolated from different  
150 kinds of cheeses (semi-hard, mold-ripened, smeared soft and fresh goat cheeses),  
151 16 industrial strains used for cheese-making, seven strains from dairy products, four  
152 strains from other food substrates (e.g., sausage or vegetables) and all the 10 wild  
153 strains available in public collections worldwide (isolated for example from soil or  
154 plant) (Table S1). We identified 699,755 SNPs across the 98 strains by mapping  
155 against the CLIB 918 reference genome (cheese strain, NCBI accession:  
156 PRJEB5752).

157 The maximum likelihood tree, principal component analysis (PCA) and neighbor-net  
158 (SplitsTree) analyses all identified the same three clades (Figure 1A), with one  
159 containing mostly wild strains (corresponding to the GeoC group identified previously  
160 based on genetic markers) (Perkins et al., 2020), one composed of strains of varying  
161 origins (i.e. dairy products and other environments, corresponding to the group  
162 previously named GeoB) and one containing mostly cheese and dairy strains  
163 (previously named GeoA). The larger sampling and the genome sequencing of the  
164 present study further revealed genetic subdivision in the cheese clade, with three  
165 clearly differentiated populations and several admixed strains (Figure 1B).

166 We performed an admixture analysis by inferring  $K$  populations,  $K$  ranging from two  
167 to ten. At  $K=3$ , the cheese, mixed-origin and wild clades were separated (Figure S1).  
168 At  $K=5$ , the cheese clade was divided into three genetic clusters, corresponding to  
169 monophyletic groups in the maximum likelihood tree and well-separated genetic  
170 clusters in the PCA and the neighbor-net (Figure 1 B, D). At higher  $K$ , new  
171 populations inferred were either too small (two individuals) or not monophyletic.  
172 Some cheese strains could not be assigned to any genetic cluster with the admixture  
173 analysis and were placed on the PCA between the three well-delimited cheese  
174 genetic clusters (Figure 1C-D), suggesting that they resulted from admixture events.  
175 To test this hypothesis, we investigated whether these strains had mosaic genomes,  
176 with different genomic regions assigned to distinct clusters. We calculated pairwise  
177 identity between unassigned strains and the other strains, computing mean identity  
178 to the different genetic clusters along scaffolds using sliding windows. For all  
179 unassigned strains in the cheese clade, we observed shifts in identity values along  
180 scaffolds, confirming that these strains are the results of admixture between clusters  
181 (Figure S2). In contrast, the three unassigned strains outside of the cheese clade did  
182 not show changes in similarity level to the different clusters along their genome;  
183 these strains may belong to yet additional genetic clusters that could not be  
184 distinguished by the analyses because too few strains belonged to these clusters in  
185 the sampling (Figure 1B).

186 We found no particular cheese type distribution among the three cheese populations,  
187 except that all strains from goat cheeses clustered in the Cheese\_1 population. The  
188 wild clade was the most differentiated population from all other *G. candidum*  
189 populations with  $F_{ST}$  values above 0.70 (Table S2). Its differentiation level was  
190 similar to that found between the domesticated *P. camemberti* mold and its wild  
191 closest relative species, *P. fuscoglaucum* ( $F_{ST} = 0.83$ ;  $d_{xy} = 6E-03$ ), and much higher  
192 than the differentiation between the cheese Roquefort population and the  
193 lumber/food spoiler population in *P. roqueforti* ( $F_{ST} = 0.27$ ). The percentage of private  
194 SNPs in the five populations was also high (Table S3). F3 tests based on the  
195 number of shared sites (Table S4) supported the differentiation between these  
196 populations.

## 197 High nucleotide diversity within cheese populations and 198 footprints of recombination

199 The overall diversity in the cheese clade ( $\pi=2.82E-3$ ) was higher than in the wild  
200 population ( $\pi=2.12E-03$ ). Each of the three cheese populations of *G. candidum* had  
201 however reduced nucleotide diversities compared to wild and mixed-origin  
202 populations (Table S5), by at least a factor of two. The Cheese\_2 population showed  
203 the lowest genetic diversity ( $\pi=4.82E-04$ ), by a factor of four compared to the two  
204 other cheese populations (Table S5), being of the same order of magnitude as in the  
205 Roquefort *P. roqueforti* population (Dumas et al., 2020). The Cheese\_1 population  
206 had a nucleotide diversity ( $\pi=1.26E-03$ ) similar to that in the domesticated cheese  
207 species *P. bifforme* ( $\pi=1.09E-03$ ), whereas the Cheese\_3 population ( $\pi=1.92E-03$ )  
208 was genetically as diverse as *P. fuscoglaucum* ( $\pi=1.93E-03$ ), the closest wild  
209 relative of the clonal lineage *P. camemberti* (Ropars et al., 2020b).

210 *Geotrichum candidum* is a heterothallic fungus, meaning that sexual reproduction  
211 can only occur between two haploid cells carrying different mating types. Two mating  
212 types have been described in *G. candidum* (Morel et al., 2015): MATA, encoded by a  
213 HMG box gene homolog to the MATA2 *Kluyveromyces lactis* allele, present in CLIB  
214 918 (sequence id: HF558448.1), and MATB, encoded by an alphabox gene homolog  
215 to the MAT $\alpha$ 1 *S. cerevisiae* allele, present in the strain CBS 615.84 (sequence id:  
216 HF558449.1). In the Cheese\_2 population, we found a significant departure from the  
217 1:1 mating-type ratio expected under regular sexual reproduction; all the 12 strains  
218 carried the MATB allele, suggesting that this population is at least partly clonal  
219 (Table S6). The absence of linkage disequilibrium decay with physical distance  
220 between two SNPs (Figure S3), together with the absence of reticulation in the  
221 neighbor-net (Figure 1), are also consistent with a lack of recombination in the  
222 Cheese\_2 population. However, pairwise homology index (PHI) tests, testing with  
223 permutations the null hypothesis of no recombination by looking at the genealogical  
224 association among adjacent sites, were significant in all the *G. candidum* populations  
225 (Table S7); this indicates that recombination did occur at least in a recent past in the  
226 Cheese\_2 population.

227 We did not detect any accumulation of nonsense or missense mutations in any  
228 population compared to silent mutations (Felsenstein, 1974; Table S8), while  
229 degeneration can be expected to be particularly strong in clonally replicated

230 populations as recombination allows more efficient selection. None of the genes that  
231 presented nonsense mutation had predicted functions that could be detected as  
232 specific either to the wild or cheese environments (Figure S4). This also suggest that  
233 the absence of sexual reproduction in the Cheese\_2 population may be too recent to  
234 observe degeneration.

235 In contrast to the Cheese\_2 population, we found both mating-type alleles in  
236 balanced proportions in both Cheese\_1 and Cheese\_3 populations (Table S6) and  
237 we observed sharp decays in linkage disequilibrium (LD) with genomic distance,  
238 although LD levels remained higher than in the mixed-origin and wild populations  
239 (Figure S3). We observed reticulations in the neighbor-net network within  
240 populations and, to a lesser extent, between populations (Figure 1A).

241

242 As previously mentioned, the 16 commercial starter strains in our *G. candidum*  
243 dataset were scattered in the maximum likelihood tree (in yellow, Figure 1B.a.) and  
244 we detected above footprints of recombination in the Cheese\_1 and Cheese\_3  
245 populations (Figure 1A, Figure S3). We nevertheless detected a few groups of  
246 clonemates, by the lack of branches in the trees and the presence of fewer than  
247 1,200 SNPs between strains (Figure 1; Table S1, clonal group column). As strains  
248 within these clonal lineages were isolated from different cheeses, it indicates that  
249 some lineages may be clonally cultivated for cheese-making; some of the  
250 commercial starter strains indeed clustered within these clonal groups (“\$” symbol on  
251 Figure 1B). Within the admixed cheese strains, 19 out of 23 were part of clonal  
252 lineages, suggesting that hybrid lineages may have been selected for beneficial traits  
253 for cheese-making, as in other domesticated fungi (e.g. *S. pastorianus*; Gallone et  
254 al., 2018).

## 255 Copy number variation: loss of two tandem beta lactamase-like 256 genes in the cheese populations and repeat expansion

257 Expansions of gene families involved in specific metabolism pathways, of  
258 transposable elements and loss of genes no longer required in the new environment  
259 can be involved in adaptation to new environments. For example, variations in gene  
260 copy number were associated with the adaptation of *S. cerevisiae* to beer making,  
261 with duplications of genes involved in maltose and maltotriose metabolism  
262 specifically in domesticated beer strains (Gallone et al., 2016; Giannakou et al.,



263 2020; Gonçalves et al., 2016). We therefore looked for gene copy-number variation  
264 (CNV) that differentiated wild and cheese populations, using 500 bp sliding windows  
265 and two reference genomes, belonging to the Cheese\_3 and the wild populations,  
266 respectively (Table S9). Using the Cheese\_3 reference, we found 61 CNV regions  
267 (mean length of 1515 bp and 45 non-genic CNVs), encompassing in total 16 genes,  
268 half having predicted functions, none being obviously related to cheese adaptation  
269 (e.g. methylglyoxal reductase and tRNAs, Table S9). Using the wild genome  
270 reference, we found 132 CNV regions (mean length of 1664 bp and 105 non genic  
271 CNVs), encompassing 29 genes (seven with unknown functions).  
272 One of these regions, 20 kb long, included only two genes, both matching the Pfam  
273 hidden markov model for beta-lactamases; these two genes (g5112 and g5113)  
274 were absent from all cheese populations, and were present in most wild strains  
275 (except one that had partially the region) and in four strains belonging to the mixed-  
276 origin population (Figure 2). The nucleotide identity between the two beta lactamase-  
277 like genes was 93%. A third beta lactamase-like gene (g5111) was found  
278 immediately next to this CNV region in all *G. candidum* strains, and displayed a  
279 nucleotide identity of 87% with the two other beta lactamase-like genes within the  
280 CNV. Surrounding these different genes, we found several *Tc1/mariner*, a  
281 LINE/Tad1 and other DNA transposons, that may have contributed to the beta-  
282 lactamase-like gene deletion (Figure 2). Fungal beta lactamase-like genes are  
283 known to contribute to hydrolysis of microbial and plant xenobiotics, and thus may be  
284 important in the wild environment to compete with other microorganisms (Gao et al.,  
285 2017). The cheese populations may have lost these two copies of the beta-  
286 lactamase genes due to relaxed selection; indeed, these functions may not be useful  
287 in the cheese environment if *G. candidum* is inoculated in high quantity compared to  
288 potential competitors.

289

290 *De novo* detection of repeats using the wild strain LMA-244 yielded a library  
291 containing 107 types of repeated elements (including 15 types of DNA transposons  
292 and 11 of retroelements and 3 rolling-circles). We identified 14 types of repeated  
293 elements present in at least one other *G. candidum* genome with five times more  
294 copies than in the LMA-244 wild strain (this threshold was set based on the fat tail of  
295 the distribution; Figure S5). Among these 14 types of repeated elements, several  
296 DNA transposons of the *Tc1/mariner* repeat family showed a cheese-clade specific

297 expansion (Table S10, Figure 3). Several unidentified, *Tad1* and *Helitron* repeat  
298 types also showed expansions in the cheese clade, alongside a milder expansion in  
299 the mixed origin clade. Such transposable element expansions in the cheese clade  
300 could be due to relaxed selection (Baduel et al., 2019).

### 301 Genomic footprints of adaptation: genomic islands of 302 differentiation in cheese populations and genes under positive 303 selection

304 We looked for genomic regions with a greater differentiation or a lower genetic  
305 diversity than the genomic background when comparing each of the three cheese  
306 populations to the wild population, to detect footprints of divergent selection and  
307 recent selective sweeps, respectively. We scanned the whole genome using non-  
308 overlapping windows and explored the windows with the 1% highest  $d_{xy}$  (high  
309 differentiation) or 5% lowest  $\pi$  (low diversity) values. Regions of high differentiation  
310 appeared as outliers in the distribution of  $d_{xy}$  values, representing a small peak of  
311 high  $d_{xy}$  values (Figure S6), and were often located in non-genic or in low gene-  
312 density regions (Figure S7). We however detected 69 genes in the high-  
313 differentiation regions across the three cheese populations, including 26 genes with  
314 predicted functions. Two of them encoded proteases, one of them being an ADAM  
315 metalloprotease which was an enriched function in the high-differentiation regions  
316 when compared to the rest of the genome, and the only one (Table S11). Proteases  
317 are important in cheese-making as the breakdown of milk caseins greatly contributes  
318 to cheese texture and decreases water activity by degrading proteins into molecules  
319 with free carboxyl and amino groups (McSweeney, 2004). *Geotrichum candidum* is  
320 prevalent during the amino-acid catabolism ripening step of Pelardon fresh cheese  
321 (Penland et al., 2021), suggesting that *G. candidum* plays an important role in  
322 proteolysis in cheese-making.

323 In the 198 windows representing the pooled set of the 5% lowest  $\pi$  values in the  
324 three cheese populations, we detected 497 genes, 323 of which had predicted  
325 functions. Among the 323 annotated genes, five predicted proteases or lipases.  
326 Although these functions were not enriched compared to the rest of the genome  
327 (Table S11), this could still represent footprints of selection on some of these  
328 individual genes. Lipases are key enzymes for cheese flavor as they enable the

329 breakdown of milk fats through fatty acid production (Collins et al., 2003), and are  
330 thus crucial for cheese-making.

331 We searched for genes evolving under positive selection in terms of high rates of  
332 non-synonymous substitutions by performing McDonald and Kreitman (MK) tests  
333 (Table S12), comparing the mixed-origin population to each cheese population and  
334 to the cheese clade as a whole. We detected 25 genes as evolving under positive  
335 selection in at least one cheese population (9 for Cheese\_1, 18 for Cheese\_2, two in  
336 Cheese\_3 and one in all three cheese populations at once; Table S12). Among  
337 them, a metalloendopeptidase evolved under positive selection in all three cheese  
338 populations, likely playing a role in casein degradation through cell lysis (Dugat-Bony  
339 et al., 2015; KUMURA et al., 2002). A Glucan 1,3-beta-glucosidase was also  
340 detected as evolving under positive selection in the Cheese\_2 population; this  
341 enzyme could be involved in fungal inhibition through fungal cell degradation  
342 (Adams, 2004). The other genes under positive selection had either no predicted  
343 function or putative functions that could not be related to cheese adaptation (Table  
344 S12).

## 345 Phenotypic differentiation between cheese and wild populations

### 346 Denser mycelial growth and/or faster proteolysis in cheese populations 347 of *Geotrichum candidum*

348 Strains selected by humans are expected to display specific traits beneficial for  
349 cheese-making, such as faster growth in cheese at cave temperature or colonies of  
350 attractive aspect or color. For example, the *P. camemberti* strains used for soft  
351 cheese production were selected for their white and fluffy aspect, to make cheeses  
352 more attractive to consumers compared to the blue-grey crust produced by the *P.*  
353 *camemberti* ancestor (Pitt et al., 1986). In contrast, the ability to grow in harsh  
354 conditions may have been lost in cheese strains due to relaxed selection, as often  
355 reported for unused traits in human-made environments in domesticated organisms  
356 (Gallone et al., 2018; Price, 2002; Ropars et al., 2015).

357 We therefore measured colony radial growth of 31 strains from the five *G. candidum*  
358 populations on different agar media (cheese, rich and poor media) at different  
359 temperatures. Wild populations grew faster than cheese populations on all media at  
360 all temperatures, with a more pronounced difference at 25°C (Table S13, Figure S8).

361 This may result from trade-offs with other traits, such as a fluffier mycelium, i.e. more  
362 vertical growth at the expense of less radial growth.

363 To test whether cheese populations had a denser mycelium or had become whiter  
364 and/or fluffier, we compared the opacity of populations on cheese agar at cave  
365 temperature (10°C), which integrates the brightness and fluffiness of a colony. The  
366 Cheese\_1 and Cheese\_3 populations were not more opaque than wild populations  
367 (Figure 4B). The Cheese\_2 population had a significantly higher opacity than all  
368 other *G. candidum* populations, except the mixed-origin population (post-hoc Tukey  
369 test in Table S13). This represents a convergence with *P. camemberti* var.  
370 *camemberti*, with independent evolution of similar phenotypes in two distantly related  
371 cheese fungi.

372 Lipolysis and proteolysis are crucial biochemical processes during cheese ripening,  
373 that influences flavor and texture of the final product; lipolysis and proteolysis  
374 contribute to energy and nutrient uptake, and they affect the production of volatile  
375 compounds, which are key flavor factors in cheeses (McSweeney, 2004). All  
376 populations of *G. candidum* had similar lipolysis rates. The wild and mixed-origin  
377 populations had degraded a significantly higher amount of proteins than the cheese  
378 populations and we did not detect any proteolysis in the Cheese\_2 population in our  
379 experiment (Figure S9; Table S14).

380 No adaptation to high salt concentration or milk origin in cheese  
381 populations

382 Cheese is a salty medium, with the percentage of salt varying from 0.5 g / 100 g for  
383 Emmental to 3 g / 100 g for Roquefort. Salt is added on the surface of cheeses to  
384 prevent the growth of contaminants, and cheese populations of *G. candidum* may  
385 thus have adapted to high salt concentrations. Cheeses display a wide range of salt  
386 concentrations so we tested four cheese media: unsalted, 1% salt as St Nectaire and  
387 cream cheeses, 2% as Camembert and goat cheeses and 4% as Roquefort blue  
388 cheeses. Wild populations grew faster than cheese populations in all salt  
389 concentrations tested, as on YPD and minimal media (Figure S10A ;Table S13).

390 Because all strains sampled from goat cheeses belonged to the Cheese\_1  
391 population, we tested whether this population was able to grow faster on goat  
392 cheese medium (1% salt) compared to other populations. We however found no  
393 significant interaction between population and media on radial growth effects, i.e. no

394 specific adaptation to any particular kind of milk by the different populations (Figure  
395 S10B).

### 396 Contrasting volatile compound production between wild and cheese 397 populations

398 Cheese ripening fungi, including *G. candidum*, contribute to cheese flavor through  
399 the production of volatile compounds (McSweeney, 2004). Flavor is a crucial  
400 criterion for cheese consumers and the cheese populations may have been selected  
401 for desirable and specific volatile compounds. We grew 14 *G. candidum* strains on a  
402 sterilized Camembert curd for 21 days at 10°C, *i.e.*, the ripening conditions of a  
403 Camembert. On average across compounds, the wild population produced five times  
404 higher quantities of volatiles than cheese populations. In order to compare the  
405 relative proportions of the different compounds, which is also an important aspect for  
406 flavor, we standardized the values by dividing all compound quantities by the total  
407 quantity of volatiles per sample. The PCA indicated a differentiation between wild  
408 and cheese strains in terms of volatile relative proportions (Figure 4D). The wild  
409 population thus produced combinations of volatile compounds different from cheese  
410 populations, with a high proportion of ethyl esters and ethyl acetates (Figure S10C),  
411 known to be key compounds in fermented beverages such as wine and beer.  
412 However, the impact of ethyl acetate on flavor is rather negative because it brings  
413 solvent type notes. In cheese, these esters are never predominant (Liu et al., 2004;  
414 Urbach, 1997). Ethyl esters are involved in anaerobic metabolism and may be  
415 important for survival in the wild. By contrast, cheese strains produced many  
416 alcohols, ketones, aldehydes and sulfur compounds (Figure S10C), known for  
417 producing attractive flavors such as buttery, cheesy, fermented and aldehydic notes  
418 (Curioni and Bosset, 2002). These volatile compounds, attractive in cheese, were  
419 present in similar absolute quantities in wild strains but were in minor proportions  
420 compared to other volatile compounds (Table S13), suggesting that cheese  
421 populations evolved a lower production of undesirable and unused volatiles. The  
422 overall balance between different volatile compounds is as important as volatile  
423 absolute quantities for flavor perception (Liu et al., 2004). The dimethyl sulfone, a  
424 compound previously reported to be produced during the catabolism of L-methionine  
425 in *G. candidum*, is actually specifically produced by the cheese populations  
426 (Bonname et al., 2001; Penland et al., 2021).

427 Cheese populations inhibit more the growth of food spoilers than wild  
428 populations

429 Cheese is a protein- and fat-rich medium, where many microorganisms, including  
430 desired microbes, but also spoilers, can thrive and thus compete for nutrients; for  
431 example, iron is limiting in cheese (Mayo et al., 2021; Monnet et al., 2015, 2012).  
432 Cheese *G. candidum* populations may have been selected for excluding competitors  
433 by inhibiting their growth (Boutrou and Gueguen, 2005). This fungus is known to  
434 inhibit fungal and bacterial food spoilers, such as *Aspergillus* species and *Listeria*  
435 *monocytogenes*, but these inhibitory activities have only been investigated in cheese  
436 *G. candidum* strains so far (Dieuleveux et al., 1998; Nielsen et al., 1998; Omeike et  
437 al., 2021). We therefore tested whether cheese populations displayed better growth  
438 inhibition abilities than the wild population, using common fungal food spoilers as  
439 competitors: *Debaryomyces hansenii*, *Penicillium biforme*, *P. roqueforti* and  
440 *Scopulariopsis asperula*. We also tested whether growth inhibition of challengers  
441 occurred via secreted and/or volatile compounds.

442 ***Inhibition by a mycelium lawn*** - In the first experiment, we grew challengers in a  
443 central spot for 24h, alone or after spreading out *G. candidum* to let it grow as a  
444 lawn; growth inhibition could occur in this setting by secreted molecules in the  
445 medium, volatile compounds and/or a physical barrier to reach nutrients and grow.  
446 The growth of *D. hansenii* was completely inhibited by all populations of *G.*  
447 *candidum*. *Penicillium roqueforti* was strongly inhibited by *G. candidum*, in particular  
448 by the Cheese\_2 population that completely prevented *P. roqueforti* growth (Figure  
449 5; Table S13). The growth of *Scopulariopsis asperula* and *P. biforme* was also  
450 inhibited by *G. candidum*, with a significant difference between competitor growth  
451 when spread alone or on a *G. candidum* lawn; the Cheese\_2 population again  
452 inhibited better competitors than any other population (Figure 5; Table S13). The  
453 Cheese\_2 population was the most opaque population on cheese and had a beta-  
454 glucanase gene under positive selection, suggesting that challenger inhibition would  
455 be due to either mycelium density as a physical barrier or degradation of competitor  
456 cell wall.

457 ***Inhibition by volatile compounds*** - In a second experiment, we used splitted Petri  
458 dishes (the two parts being separated by a plastic barrier) to test whether cheese  
459 populations inhibited competitors to a greater extent than the wild population when  
460 only volatile compounds can reach challengers. No significant growth difference was

461 observed between the growth alone and at the side of *G. candidum* for neither *S.*  
462 *asperula* nor *P. roqueforti* (Figure 5B, Table S13). Only *P. biforme* showed a  
463 significant growth inhibition by *G. candidum* in this setup (Table S13); such a growth  
464 inhibition by *G. candidum* from an isolated Petri dish compartment indicates that  
465 volatile compounds produced by *G. candidum* are able to impair the growth of some  
466 competitors.

467 The two sets of experiments enabled us to assess by which mechanism *G.*  
468 *candidum* can inhibit competitors: *P. biforme* growth was inhibited by *G. candidum* in  
469 the splitted Petri dishes, suggesting that volatile compounds are able to impair its  
470 growth. On the contrary, *P. roqueforti* and *S. asperula* were only inhibited by *G.*  
471 *candidum* when molecules could diffuse in their medium and *G. candidum* mycelium  
472 could form a physical barrier. The Cheese\_2 population had a stronger inhibition  
473 ability than the other *G. candidum* populations only when molecules could diffuse in  
474 the medium and the mycelium could act as a barrier.

475

## 476 Discussion

477 Analyzing the genomes of 98 *G. candidum* strains isolated from different kinds of  
478 cheeses, other food substrates and other environments revealed three monophyletic  
479 clades, corresponding to strains isolated from cheese, mixed-origins (dairy and other  
480 environments) and the wild, respectively. Within the cheese clade, we found three  
481 distinct clusters and several admixed strains. In terms of genetic diversity, the mixed-  
482 origin clade contained the highest diversity level, followed by the wild clade and then  
483 the distinct cheese populations. However, the nucleotide diversity within each of the  
484 cheese populations was still relatively high compared to other cheese fungi. Indeed,  
485 the Cheese\_2 population, while being four times less diverse than the two other  
486 cheese populations, was as diverse as the Roquefort *P. roqueforti* cheese  
487 population. The low diversity, the presence of a single mating type, a high level of  
488 linkage disequilibrium and the absence of reticulation in the neighbor-net network  
489 indicated a lack of recombination in the Cheese\_2 population, that may thus  
490 correspond to a clonally cultivated line for cheese-making. Additional, less  
491 widespread clonal lineages may be cultivated for cheese-making, as we found  
492 clonemates in all cheese populations, even in the clusters of intra-specific hybrids,

493 and including some commercial starter strains. This presence of commercial starter  
494 strains in the clusters of intra-specific hybrids suggests that hybrid lineages may  
495 have been selected for beneficial traits for cheese-making, as in other domesticated  
496 fungi (e.g. *Saccharomyces pastorianus* used for the production of lager beer) but this  
497 needs further investigation (Rainieri et al., 2006). The Cheese\_1 population was as  
498 diverse as the domesticated cheese species *P. biforme* and the Cheese\_3  
499 population as its wild relative *P. fuscoglaucum*. The genetic diversity of the cheese  
500 clade as a whole was even higher than that in the wild population, which may be due  
501 to the relatively low number of wild strains available and to the diversification of the  
502 cheese clade into three varieties.

503 The genetic relationships between *G. candidum* populations and their contrasting  
504 levels of diversity suggest that domestication occurred in several steps, with an  
505 ancient domestication event separating the mixed-origin and the wild clades, then  
506 the cheese and the mixed-origin clades, and yet more recently the three cheese  
507 clusters. The domestication of *P. camemberti* similarly occurred in several steps, the  
508 last steps involving the selection of a white and fluffy clonal lineage (Ropars et al.,  
509 2020b). Considering the genetic diversity, the situation in *G. candidum* is however  
510 very different from that of *P. camemberti* and *P. roqueforti*, for which a single or a  
511 few clonal lineages are sold by spore producers for all kinds of cheeses (Ropars et  
512 al., 2020b). The domestication of *G. candidum* did not involve strong bottlenecks that  
513 occurred in other domesticated cheese fungi, such as *P. camemberti*, *P. roqueforti*  
514 and *S. cerevisiae*, perhaps because it is more abundant spontaneously in raw milk  
515 and because there has been a diversification into three genetically differentiated  
516 varieties. It may also be that the domestication of the three *G. candidum* varieties is  
517 more recent or has not involved a selection as strong as in other cheese fungi,  
518 except perhaps in the Chhese\_2 lineage. Sampling further cheese types, geographic  
519 regions and wild environments may reveal further genetic clusters.

520

521

522 We found evidence of phenotypic adaptation to cheese-making in *G. candidum*  
523 cheese populations, with a slower growth on all media, even cheese, a prominent  
524 production of attractive cheese flavors and a lower proteolytic activity compared to  
525 the wild population. The slower growth and proteolysis activity may allow to prevent  
526 a too fast degradation of products during maturation, as found in the Roquefort *P.*



527 *roqueforti* population (Dumas et al. 2020). The lack of adaptation to salt was also  
528 found in the Roquefort *P. roqueforti* population and in dry-cured meat *Penicillium*  
529 fungi and may be due to evolutionary constraints (Lo et al., 2022). We also found  
530 genomic footprints of adaptation to cheese, with the presence of genomic islands of  
531 differentiation in cheese populations and the loss of genes no longer required in the  
532 human-made environment, i.e. tandem beta lactamase-like genes. This may  
533 correspond to a first step of domestication.

534 The Cheese\_2 population appeared to represent a more advanced state of  
535 domestication than the other cheese populations, with much lower genetic diversity,  
536 a fluffier mycelium, a higher competitive ability and a complete lack of proteolysis  
537 activity. Denser mycelial growth leading to a fluffy aspect at the expense of less rapid  
538 radial growth has also been selected in *P. camemberti* var. *camemberti* (Ropars et  
539 al., 2020b), thus representing a convergent phenotype between two distantly related  
540 cheese fungi. *Geotrichum candidum* is increasingly inoculated in milk in the place of  
541 *P. camemberti* for industrial soft cheese production, as it provides the fluffy desired  
542 aspect without the disadvantage of *P. camemberti* that browns the surface of  
543 Camembert cheeses at the end of the ripening process (Carreira et al., 2002).  
544 Proteolysis activity was also found lower in the Roquefort *P. roqueforti* population,  
545 which may be beneficial to obtain not too degraded cheeses (Dumas et al. 2020).  
546 The volatile proportions produced by cheese strains corresponded to attractive flavor  
547 for cheese-making, in contrast to wild strains, as also documented in *P. roqueforti*  
548 (Caron et al., 2021; Dumas et al., 2020). *Geotrichum candidum* is able to efficiently  
549 inhibit the growth of common food spoilers, in particular *P. biforme* and *P. roqueforti*,  
550 and the clonal Cheese\_2 population is the most efficient competitor.

551  
552 Our study shows that it is of fundamental importance to study further domestication  
553 in various cheese fungi as it allows assessing whether independent adaptation  
554 events to similar media and usage lead to evolutionary convergence, as this is an  
555 important question in evolutionary biology (Alberto et al., 2018; Cresko et al., 2004;  
556 Dyer et al., 2012; Elmer et al., 2014, 2010; Lin et al., 2012; Macías et al., 2021;  
557 O'Quin et al., 2010; Thorpe et al., 2015). We found here both similarities  
558 (convergence) and differences in the adaptation of *G. candidum* to cheese compared  
559 to other cheese fungi. One of the most striking convergence was the evolution of a  
560 fluffy and white mycelium as in *P. camemberti* with a trade-off with radial growth

561 (Ropars et al., 2020b). The higher competitive ability and lower proteolysis activity,  
562 as well as the greater production of positive volatile compounds, also represent  
563 interesting convergence events between multiple very distant fungal lineages,  
564 indicating that evolution can be repeatable.

565

566 Our findings also have industrial implications, as they reveal high genetic diversity  
567 and subdivision in a fungus widely used in the cheese industry, and the existence of  
568 different varieties, *i.e.*, genetically and phenotypically different populations used for  
569 cheese-making, with specific and contrasted traits beneficial for cheese-making. The  
570 most fluffy and most competitive cheese population corresponded to a clonal lineage  
571 which may represent the most recent selection event. The occurrence of  
572 recombination between cheese strains is highly relevant for cheese producers as it  
573 opens possibilities for further improvement for the agrofood sector. It is crucial to  
574 maintain the larger genetic diversity in cheese *G. candidum* populations as genetic  
575 diversity is essential in domesticated organisms for variety improvement and  
576 diversification and to avoid degeneration (Harlan et al., 2012).

577

## 578 Material and Methods

### 579 Sampling

580 We isolated 53 strains from different kinds of cheeses (e.g. Camembert, Brie, Saint  
581 Nectaire, Ossau Iraty, comté, bleu de chèvre) from five European countries, Canada  
582 and the USA. Cheese crusts were left in the freezer for 24h to kill acarids. Then, we  
583 diluted a piece of each crust in sterile water and spread 50 uL of the suspension on a  
584 malt agar Petri dish. When colonies appeared on the Petri dish, typically after three  
585 days, we isolated the different morphotypes with a sterile toothpick and inoculated  
586 them on new Petri dishes. After seven days of growth, we performed monospore  
587 isolation by several dilution steps, in order to obtain separated colonies arising each  
588 from a single spore. We identified the species of these pure strains after DNA  
589 extraction by sequencing the 5' end of the nuclear ribosomal large subunit (LSU  
590 rDNA) using the LROR/LR6 oligonucleotide primers (Vilgalys and Hester, 1990). We  
591 also gathered 24 strains from INRAE, isolated from cheeses but also other

592 environments (e.g. sand, hay, rainforest) and 15 strains from a French spore seller.  
593 We gathered all the wild strains available in public collections. For each strain, single  
594 spore cultures were generated to ensure the presence of a single genotype before  
595 DNA extraction.

596 The LMA-244 strain were inoculated on Yeast Extract Glucose (YEG) agar plates  
597 (10 g.L<sup>-1</sup> of yeast extract (Fischer Scientific), 10 g.L<sup>-1</sup> of D-glucose (EMD  
598 Chemicals) and 15 g.L<sup>-1</sup> of Bacto agar (BD Diagnostics)) directly from 15% glycerol  
599 (v/v) stock cultures stored at -80°C. The plates were incubated in the dark for five  
600 days at 25°C.

601 DNA extraction, genome sequencing, assembly, annotation and  
602 mapping

603 We used the Nucleospin Soil Kit (Macherey-Nagel, Düren, Germany) to extract DNA  
604 from 88 *G. candidum* strains cultured for five days on malt agar. Sequencing was  
605 performed with Illumina HiSeq 3000 paired-end technology (Illumina Inc.), 2x150 bp.  
606 For the eight LMA strains, sequencing was performed using the Illumina HiSeq  
607 paired-end technology.

608 All Illumina reads were trimmed and adapters cleaned with Trimmomatic v0.36  
609 (Bolger et al., 2014). Leading or trailing low quality or N bases below a quality score  
610 of three were removed. For each read, only parts that had an average quality score  
611 higher than 20 on a four base window are kept. After these steps, only reads with a  
612 length of at least 36 bp were kept.

613 Cleaned Illumina reads were assembled with SPAdes v3.15.3 not using unpaired  
614 reads with "--careful" parameter.

615 For the LMA-244 strain, Genomic DNA was extracted using the Fungi/Yeast  
616 Genomic DNA Isolation Kit (Norgen Biotek Corp.) with the following modifications.  
617 Thirty milligrams of frozen grounded mycelium were thawed and homogenized in  
618 500 µL of a 0.9% NaCl solution. The elution buffer was replaced by a Tris 10 mM  
619 buffer (pH 8). Following the extraction step, gDNA suspensions were purified and  
620 concentrated using Agencourt AMPure XP magnetic beads (Beckman-Coulter),  
621 according to the manufacturer's protocol.

622 DNA concentration and purity were measured using a NanoDrop ND-1000  
623 spectrophotometer (Thermo Fisher Scientific Inc., Wilmington, U.S.A.) and a Qubit  
624 Fluorometer 3.0 (Thermo Fisher Scientific Inc., Wilmington, U.S.A.).

625 The DNA library was prepared following the Pacific Biosciences 20 kb template  
626 preparation using BluePippin Size-Selection System protocol and the Pacific  
627 Biosciences Procedure & Checklist – Preparing Multiplexed Microbial Libraries Using  
628 SMRTbell Express Template Prep Kit 2.0 protocol. No DNA shearing was performed.  
629 The DNA damage repair, end repair and SMRT bell ligation steps were performed as  
630 described in the template preparation protocol with the SMRTbell Template Prep Kit  
631 1.0 reagents and the SMRTbell Express Template Prep Kit 2.0 reagents (Pacific  
632 Biosciences, Menlo Park, CA, USA). The DNA library was size selected on a  
633 BluePippin system (Sage Science Inc., Beverly, MA, USA) using a cut-off range of  
634 10 kb to 50 kb. The sequencing primer was annealed at a final concentration of 0.83  
635 nM and the P6 v2 polymerase was bound at 0.50 nM while the sequencing primer  
636 was annealed with sequencing primer v4 at a final concentration of 1 nM and the  
637 Sequel 3.0 polymerase was bound at 0.5 nM.. The libraries were sequenced on a  
638 PacBio RS II instrument at a loading concentration (on-plate) of 160 pM using the  
639 MagBead OneCellPerWell loading protocol, DNA sequencing kit 4.0 v2, SMRT cells  
640 v3 and 4 hours movies.

641

642 Raw PacBio reads were corrected using Illumina reads already available and  
643 described in a previous article (Perkins et al., 2020), with the default parameters of  
644 the LoRDEC software and trimmed with Canu v1.6 (Koren et al., 2017; Salmela and  
645 Rivals, 2014). Corrected and trimmed PacBio reads were then assembled using  
646 Canu v1.6. Illumina polishing of the Canu assembly was performed using Pilon v1.22  
647 (Walker et al., 2014). A final assembly step was then performed with the hybrid  
648 assembler SPAdes v3.11.1 using the trimmed PacBio reads, the Illumina reads and  
649 the Pilon corrected assembly as trusted contigs (Antipov et al., 2016; Pribelski et al.,  
650 2020) . Additionally, the CLIB 918 assembly (Bioproject PRJEB5752) was used as a  
651 reference in the SPAdes script for the assembly of each *G. candidum* genome  
652 (Morel et al., 2015). Scaffolds were filtered using the khmer software with a length  
653 cut-off of 1,000 bp (Crusoe et al., 2015).

654

655 The LMA-244 PacBio assembly and reads have been deposited in GenBank:  
656 nbPROJECT. To annotate short read assemblies and the LMA-244 genome, gene  
657 prediction was performed using Augustus v3.4.0 (Stanke et al., 2008). The training  
658 annotation file “saccharomyces” was used, with parameters as follows: “--gff3=on”,  
659 “--protein=on”, “--codingseq=on”, “--exonnames=on”, “--cds=on” and “--  
660 uniqueGeneld=true”. The output of Augustus and the CLIB 918 gff was provided to  
661 Funannotate v1.8.9 (ref DOI:10.5281/zenodo.4054262) for functional annotation.  
662 InterProscan was used under Funannotate pipeline locally (Blum et al., 2021).  
663 Funannotate then searched in the Pfam database v34.0 and dbCAN database  
664 version 10.0 with Hmmer v3.3.2 (Eddy, 2011; Huang et al., 2018; Mistry et al., 2021),  
665 in database UniProt version 2021\_03 and database MEROPS version 12.0 with  
666 diamond blastp v2.0.11 (Rawlings et al., 2018; The UniProt Consortium et al., 2021),  
667 eggNOG-mapper v2 on the database eggNOG 5.0 (Cantalapiedra et al., n.d.;  
668 Huerta-Cepas et al., 2019).

669 Cleaned reads were mapped on the reference genomes CLIB 918 and LMA-244  
670 using Bowtie2 v2.4.2 (Langmead and Salzberg, 2012). Maximum fragment length  
671 was set to 1000 and the preset “very-sensitive-local” was used.

672 SAMtools v1.7 (Li et al., 2009) was used to filter out duplicate reads and reads with a  
673 mapping quality score above ten for SNP calling and above one for CNV analyses.

674

675 In total, we have a dataset of 98 genomes, 88 being sequenced, eight from the  
676 University of Laval (LMA strains: Bioproject PRJNA482576, PRJNA482605,  
677 PRJNA482610, PRJNA482613, PRJNA482616, PRJNA482619, PRJNA490507,  
678 PRJNA490528), one strain CLIB 918 from the Collection de Levures d'Intérêt  
679 Biotechnologique (Bioproject PRJEB5752), and one of the strain Phaff72-186 from  
680 the 1000 Fungal Genomes project (Bioproject PRJNA334358 NCBI).

## 681 SNP calling

682 Single nucleotide polymorphisms (SNPs) were called using GATK v4.1.2.0  
683 HaplotypeCaller, which provides one gVCF per strain (option -ERC GVCF). GVCFs  
684 were combined using GATK CombineGVCFs, genotypes with GATK  
685 GenotypeGVCFs, SNPs were selected using GATK SelectVariants (option -select-  
686 type SNP). SNPs were filtered using GATK VariantFiltration and options QUAL < 30,  
687 DP < 10, QD < 2.0, FS > 60.0, MQ < 40.0, SOR > 3.0, QRANKSUM < -12.5,

688 ReadPosRankSum < -8.0. All processes from cleaning to variant calling were  
689 performed with Snakemake v5.3.0 (script available at  
690 [https://github.com/BastienBennetot/Article\\_Geotrichum\\_2022](https://github.com/BastienBennetot/Article_Geotrichum_2022)).

### 691 Phylogenetic analysis

692 We inferred phylogenetic relationships among the 98 isolates using the dataset of  
693 699,755 SNPs in a maximum likelihood framework using IQ-Tree2 v2.1.1 (Minh et  
694 al., 2020). The tree has been midpoint rooted. The best-fit model chosen according  
695 to Bayesian information criterion (BIC) was TVMe+R2 . Branch supports are ultrafast  
696 bootstrap support (1000 bootstrap replicates, Minh et al., 2013).

### 697 Genetic structure

698 We used the dataset of 699,755 SNPs to infer population structure based on the  
699 mapping on the CLIB 918 reference genome. We used Splitstree v4.16.2 (Huson  
700 and Bryant, 2006) for the neighbor-net analysis. We used the R package *Ade4*  
701 (Bougeard and Dray, 2018; Chessel et al., 2004; Dray et al., 2007; Dray and Dufour,  
702 2007; Thioulouse et al., 2018) for principal component analyses (PCA, centered and  
703 unscaled). We used NGSadmix v.33 (Jørsboe et al., 2017) from the ANGSD  
704 (Korneliussen et al., 2014) package (version 0.933-110-g6921bc6) to infer individual  
705 ancestry from genotype likelihoods based on realigned reads, by assuming a given  
706 number of populations. A Beagle file was first prepared from bam using ANGSD with  
707 the following parameters: “-uniqueOnly 1 -remove\_bads 1 -only\_proper\_pairs 1 -GL  
708 1 -doMajorMinor 1 -doMaf 1 -doGlf 2 -SNP\_pval 1e-6”. The Beagle file was used to  
709 run NGSadmix with 4 as the minimum number of informative individuals. Given the  
710 high number of strains genetically highly similar among cheese strains (that may  
711 represent clonal lineages), we randomly sampled one of the individuals for each  
712 group of clonemates identified on the ML tree as having fewer than 90,000 SNPs  
713 and filtered out the other strains (N=64 strains kept) to avoid biasing the analysis.  
714 The analysis was run for different  $K$  values, ranging from 2 to 10. A hundred  
715 independent runs were carried out for each number of clusters ( $K$ ).

716 The nucleotide diversity  $\pi$  (Nei's Pi; Hudson et al., 1992; Nei and Li, 1979), the  
717 Watterson's  $\theta$  (Watterson, 1975), the fixation index  $F_{ST}$  (Hudson et al., 1992) and the  
718 absolute divergence  $d_{XY}$  (Nei and Li, 1979) were calculated using the *popgenome*  
719 package in R (Pfeifer et al., 2014). Fixed, private and shared sites were counted

720 using custom scripts available at  
721 [https://github.com/BastienBennetot/fixed\\_shared\\_private\\_count](https://github.com/BastienBennetot/fixed_shared_private_count), with bcftools  
722 version 1.11 (using htlib 1.13+ds). F3 tests were computed using the *admixr*  
723 package v0.9.1. The pairwise homology index (PHI) test was performed using  
724 PhiPack v1.1 and CLIB 918 genome as reference.  
725 Linkage disequilibrium was calculated using vcftools v0.1.17 with the --hap-r2  
726 parameter and a minimum distance between SNPs of 15,000 bp. Values were  
727 averaged when SNPs had the same distance.  
728 Pairwise identity between an admixed strain and each non-admixed strain was  
729 calculated using overlapping sliding windows of 30 kb span and 5 kb step. Admixed  
730 clusters are indicated in Table S1. The custom script is available on  
731 [https://github.com/BastienBennetot/Article\\_Geotrichum\\_2022](https://github.com/BastienBennetot/Article_Geotrichum_2022)

## 732 Copy number variation and identification of premature stop codons in 733 CDS

734 Copy number variation (CNV) was analyzed using Control-FREEC v11.6 with the  
735 following parameters: ploidy was set to 1, non-overlapping windows of 500 bp,  
736 telomeric and centromeric regions were excluded, expected GC content was set  
737 between 0.25 and 0.55, minimum of consecutive windows to call a CNV set to 1.  
738 This analysis was performed using as references the CLIB 918 (cheese\_3) and  
739 LMA-244 (wild) genome sequences. CNVs were classified in different groups when  
740 the median of copy number was different between populations. We defined three  
741 groups: regions for which copy number was different between wild and cheese  
742 populations, between mixed-origin and cheese populations and when at least one  
743 cheese population differed from another population. For each InterPro term present  
744 in these regions, we performed enrichment tests, i.e., a fisher exact test comparing  
745 the number of a particular InterPro term found in these regions and the whole  
746 genome (Table S9).

747

748 We used snpeff (Cingolani et al., 2012) to assess how each SNP affected the coding  
749 sequence of predicted proteins, in the vcf file containing all SNPs and all genomes of  
750 our dataset. We detected premature stop codons in the 7,150 CDS of the CLIB 918  
751 genome and the 5,576 CDS of the LMA-244 genome using a custom script and  
752 bcftools v1.11.

## 753 Analyzing the repeat landscape

754 In order to *de novo* detect repeats within *G. candidum*, RepeatModeler (v2.0.2; [Flynn](#)  
755 [et al., 2020](#)), using the ncbi engine (-engine ncbi) and the option -LTRStruct, was run  
756 on the pacbio genome assembly of LMA 244 generating a library of 176 repeats. The  
757 repeat redundancy was reduced using cd-hit-est, as described in Goubert et al.,  
758 giving a final library of 108 repeats ([Goubert et al., 2022](#)). To estimate the per strain  
759 copy number of each repeat, illumina reads were aligned using bwa mem (v0.7.17;  
760 [Li, 2013](#)) to the repeat library and the median coverage for each repeat was then  
761 normalized by the LMA 244 genome wide median coverage.

## 762 Detecting positive selection

763 The assemblies LMA-317, LMA-77 and LMA-563 have been excluded for this  
764 analysis because of a N50 under ten kb. All the 437441 predicted protein sequences  
765 from the 66 genomes of all cheese clades and mixed-origin clade were searched  
766 against each other with BLASTP using diamond v0.9.36 and clustered into  
767 orthologous groups using Orthogog v1.0.3 ([Ekseth et al., 2014](#)). For these analyses,  
768 we only kept single-copy orthologs shared between two populations. We compared  
769 the mixed origin population to each cheese population and the cheese clade.  
770 Multiple nucleotide sequence alignments with predicted gene sequences were then  
771 constructed using MACSE v2.0.3 with default parameters ([Ranwez et al., 2018](#)). We  
772 performed an approximative MacDonalD Kreitman tests using the R package  
773 PopGenome ([Pfeifer et al., 2014](#)). The approximation comes from the fact that only  
774 codons with a single SNP are examined. The assumption of this version of the test is  
775 that the probability that two SNPs will appear in the same codon is very low. To  
776 identify genes evolving under positive selection in *G. candidum* genomes,  $\alpha$ , i.e. the  
777 representation of the proportion of substitutions driven by positive selection was  
778 used. Genes with an alpha under 0 were filtered out. Of these genes, only those with  
779 a Fisher's test p-value under 0.05 were kept.

## 780 Phenotypic characterization

### 781 *Sampling and strain calibration*

782 We used 36 *Geotrichum candidum* strains for laboratory experiments: seven from  
783 the Cheese\_1 population, five from the Cheese\_2 population, eleven from the  
784 Cheese\_3 population, eight from the mixed-origin population and five from the wild  
785 population (Table S1). This set encompassed 26 strains isolated from dairies, one  
786 from other food environments and nine isolated from environments other than food.  
787 Experiments were initiated with spore suspensions calibrated to  $1.10^6$  spores/mL  
788 with a hemocytometer.

### 789 *Media preparation*

790 All media were sterilized in an autoclave at 121°C for 20 minutes except those with  
791 cheese or milk for which the autoclave was run at 110°C for 15 minutes to avoid



792 curdling. Each 94mm-diameter Petri dish was filled with 25mL of the appropriate  
793 medium. Cheese medium was prepared as follows for 800mL: 300g of unsalted  
794 cream cheese from La Doudou farm in Cheptainville, 16g agar, 8g NaCl dissolved in  
795 200mL of deionized water. Deionized water was added to reach 800mL. pH was  
796 adjusted to 6.5 and drops of blue food dyes were added to enable fungal colony  
797 measures (white medium and white colonies are not distinguishable). Yeast Peptone  
798 Dextrose (YPD) medium was prepared as follows for 1L: 10g Yeast extract, 10g  
799 Bacto Peptone, 10g glucose, 14g agar powder. Minimal medium was prepared as  
800 described in “Improved protocols for *Aspergillus* minimal medium: trace element and  
801 minimal medium salt stock solutions”, Terry W. Hill, Rhodes College, Etta Kafer,  
802 Simon Fraser University. Tributyrin agar was prepared as follows: Tributyrin medium  
803 33 g/L, neutral Tributyrin 10 g/L, Bacto Agar 15 g/L. Ingredients were bought at Nutri-  
804 Bact company, Québec, Canada. Caseinate agar was prepared according to Frazier  
805 and Rupp, modified as follows: Calcium caseinate medium 37.2 g/L, Bacto Agar 15  
806 g/L. Ingredients were bought at Nutri-Bact company, Québec, Canada. For yogurt  
807 media we used three different types of raw milk, i.e. sheep, goat and cow milks,  
808 coming from d’Armenon farm near Les Molières (Esonne, France), Noue farm in  
809 Celle les Bordes and Coubertin farm in Saint-Rémy-lès-Chevreuse respectively.  
810 Each medium was prepared following the same procedure: 1L of milk was mixed  
811 with 62.5g of Danone brand yogurt, heated for 5 hour at 43°C and stored in a fridge  
812 before use. A subset of 300g of this preparation was used with 16g of agar powder,  
813 8g of NaCl, 4 drops of blue food dye and filled up with deionized water to reach  
814 800mL.

#### 815 *Growth in different conditions and different media*

816 Petri dishes were inoculated with 10 $\mu$ L of the 1.10<sup>6</sup> cells/mL in a 10% glycerol  
817 solution. Inoculated Petri dishes were wrapped with plastic film before letting them  
818 grow in the dark. A millimeter rule was used to measure two opposite diameters of  
819 fungal colonies to estimate their growth. Means of these two measures were used for  
820 statistical analyses.

821 To test media and temperature effect on growth, *G. candidum* strains were grown on  
822 minimal, YPD and cheese media. We took pictures and measured their growth at  
823 seven, 11 and 14 days for minimal, YPD and cheese media at 10°C (ripening cellar

824 temperature), at seven and 11 days for the cheese medium at 15°C and at seven  
825 days for minimal, YPD and cheese media at 25°C (Figure S8).

826 To test salt tolerance, *G. candidum* strains were grown at 10°C on cheese media of  
827 different salt concentrations: unsalted media, 1% salt as St Nectaire and cream  
828 cheeses, 2% as Camembert and goat cheeses and 4% as Roquefort blue cheeses.  
829 We took pictures and measured colony diameters after 14 days of growth.

830 To test adaptation of *G. candidum* populations to different milk origins, growth was  
831 measured on different yogurt media made from goat, sheep and cow raw milk for  
832 seven days at 25°C.

833 To test lipolytic and proteolytic activities of *G. candidum* populations, we grew strains  
834 on tributyrin agar and caseinate agar, respectively. Each strain was inoculated in  
835 triplicate Petri dishes that were let grown at 25°C for 14 days. The radius of lysis was  
836 measured and the mean between triplicates was used for the analysis.

837

838 Pictures were taken using a Scan 1200 (Interscience). Petri dishes grown on cheese  
839 were analyzed using IRIS (Kritikos et al., 2017) which measured Integral opacity  
840 scores, defined as the sum of the brightness values for all the pixels within the  
841 colony bounds.

842 *Volatile compounds analysis using Gas-chromatography mass-spectrometry (GC-*  
843 *MS)*

844 Volatile compounds produced by *G. candidum* were analyzed using gas-  
845 chromatography mass-spectrometry (GC-MS). Compounds were extracted and  
846 concentrated by using a dynamic headspace (DHS) combined with a thermal  
847 desorption unit (TDU). Strains were grown for 21 days at 10°C (minimum  
848 Camembert ripening time) on a cheese agar medium made with Camembert-type  
849 curds. After 21 days, each Petri dish content, with its medium and *G. candidum*  
850 mycelium, was mixed with a fork for one minute, gathered in vials and immediately  
851 frozen in liquid nitrogen. For each sample, three grams of frozen cultured media  
852 were weighted and stored in vials with septum caps at -80°C. Sixteen hours before  
853 analysis, samples were stored at 4°C. The Cheese\_2 population was not tested in  
854 this experiment because population delineation was not known at this time.

855 Dynamic headspace (DHS) conditions were as follows: Inert gas: He; Incubation:  
856 30°C for 3min; Needle temperature: 120°C; Trap: nature tenax, 30°C, 450 mL He;

857 He flow: 30 mL/min; Dry purge : temperature 30°C, 850 mL He, He flow 50 mL/ min.  
858 Thermal Desorption Unit (TDU) conditions were as follows: inert gas : He; Initial  
859 temperature: 30°C, then 60°C/min until 290°C kept for 7 minutes; Transfer  
860 temperature: 300°C. Cool Injection System (CIS) conditions were as follows: inert  
861 gas : He; Initial temperature: -100°C, then 12°C/s until 270°C kept for 5 minutes. Gas  
862 chromatograph (brand Agilent 7890B) was used with a polyethylene glycol (PEG)  
863 type polar phase column (HP-Innowax, ref. Agilent 19091N-116I, 60mx0.32mm,  
864 0.25µm film thickness). Helium flow was set at 1.6mL/min. Samples were injected in  
865 splitless mode with a holding time of 1 minute. To optimize separation of  
866 compounds, a specific program of the gas chromatography oven was used, with  
867 initial temperature at 40°C for 5 minutes, rising temperature from 40°C to 155°C with  
868 a slope of 4°C/min, rising temperature from 155°C to 250°C with a slope of 20°C/min  
869 and then temperature was kept at 250°C for 5 minutes. A single quadrupole mass  
870 spectrometer was used to determine m/z of sample molecules (Agilent, référence  
871 5977B MSD). Molecules were identified using NIST libraries (NIST 2017 Mass  
872 Spectral Library).

### 873 *Competition experiments*

874 To test the abilities of *G. candidum* populations to exclude other fungi by secreting  
875 molecules or volatile compounds, we compared the growth of competitors when  
876 grown alone and on a lawn of an already grown *G. candidum* mycelium. We  
877 inoculated a cheese medium with 150µL of a *G. candidum* calibrated spore solution  
878 ( $1.10^6$  spores/mL), spread evenly on the Petri dish. After 24h of growth, we  
879 inoculated 10µL of a competitor spore solution ( $1.10^6$  spores/mL) in a single spot, in  
880 the middle of the Petri dish. We used as competitors the following species and  
881 strains: *Penicillium bifforme* (ESE00018, ESE00023, ESE00125, ESE00222),  
882 *Penicillium roqueforti* (ESE00645, ESE00925, LCP06040), *Scopulariopsis asperula*  
883 (ESE00044, ESE00102, ESE00835, ESE01287, ESE01324) and *Debaryomyces*  
884 *hansenii* (ESE00284, ESE00561, ESE00576; Table S15). For each competitor, two  
885 Petri dishes were inoculated without any *G. candidum* as controls for measuring  
886 growth without a lawn.  
887 We took pictures of the Petri dishes at 6 days, when the competitor mycelium grown  
888 alone was near the Petri dishes border; we measured colony size at 7 days for *P.*  
889 *bifforme* and *P. roqueforti* and at 19 days for *D. hansenii*, which grows more slowly.

890 To test the abilities of *G. candidum* populations to exclude other microorganisms by  
891 producing volatile compounds, we set up an experiment with splitted Petri dishes  
892 where only air can be shared between the two parts. In one part of the Petri dish, we  
893 spread 75 $\mu$ L of a *G. candidum* spore solution (1.10<sup>6</sup> spores/mL) and let it grow  
894 during 24 hours before adding on the other part of the Petri dish a drop of 5 $\mu$ L of a  
895 competitor spore solution (1.10<sup>6</sup> spores/mL). For each competitor, two Petri dishes  
896 were inoculated without any *G. candidum* as controls. We used as competitors the  
897 following species and strains: *Penicillium biforme* (ESE00018, ESE00023,  
898 ESE00125, ESE00222, ESE00423), *Penicillium roqueforti* (ESE00250, ESE00631,  
899 ESE00640, ESE00925) and *Scopulariopsis asperula*(ESE00044, ESE00102,  
900 ESE00835, ESE01287, ESE01324; Table S15). Petri dishes were grown at 10°C,  
901 measured and pictured at 11 days for *P. biforme* and *P. roqueforti* and 19 days for  
902 *Scopulariopsis asperula*.

### 903 *Graphics and statistical analyses*

904 Plots and statistical analyses were made using *ggplot2* (Wickham, 2016), *rstatix* and  
905 *ggpubr* packages in the R environment. For ANOVAs, we used standard linear  
906 models in which all explanatory variables were discrete, with explained variables  
907 being radial growth for growth conditions (for media, temperature, salt content and  
908 adaptation to milk experiments), integral opacity score (for opacity experiment),  
909 relative proportions of volatiles compounds (for volatile compounds experiment) and  
910 radial growth of the competitor (for competition experiments). The explanatory  
911 variable common for all analyses was the ‘population’ of *G. candidum*. The variables  
912 ‘medium’, ‘day’ and ‘temperature’ were explanatory variables specific to the growth  
913 analysis. The ‘competitor species’ variable was specific to competition analyses. All  
914 variables and all interactions between them were implemented in the ANOVA and  
915 non-significant interactions were subsequently removed before performing post-  
916 ANOVA Tukey’s honest significant difference (HSD) tests. The data normality of  
917 residuals was checked; when residues deviated from normality (only for the opacity  
918 experiment), we also ran non-parametric tests (Wilcoxon ranking tests) using R.  
919 Radius of lysis for lipolytic and proteolytic activities experiments was often discrete,  
920 strains either showing lytic activity or not at all. This is why we decided to transform  
921 these data into qualitative discrete data in order to fit a generalized linear model with  
922 a binomial function as logit. Growth time (7, 14 and 21 days) and temperature (15

923 and 25°C) were taken as random variables because no fit could be achieved with  
924 little data and we wanted to test for population effect. Tukey contrasts were used to  
925 compare population means of populations when population effect was significant.  
926

## 927 Acknowledgments

928 We thank everyone who sent cheese crusts and Riwanon Lemee for providing 15  
929 strains from Laboratoires STANDA, Caen, France. We thank Laura Prugneau,  
930 Jérémy Raynaud, Thomas Mari, Véronique Bougie and Jules Larouche for their help  
931 in the laboratory experiments. This work was funded by the Artifice ANR-19-CE20-  
932 0006-01 ANR grant to J.R. In addition, a NSERC-Discovery Grant supported the  
933 scholarship of V.P and data generation, and is held by S. Labrie. (RGPIN-2017-  
934 06388).  
935

## 936 Author contributions

937 J.R. designed and supervised the study, and obtained funding. B.B., V.P., J.R. and  
938 A.S. generated the data. C.G. provided strains from the CIRM-Levures INRAE  
939 collection. B.B., J.-P.V., R.C.d.I.V. and S.O. analyzed the genomes. B.B., S.H., J.R.  
940 and A.S. performed the experiments. B.B. analyzed the data from laboratory  
941 experiments. M.H.L. and St.L. supervised the lipolysis and proteolysis analyses.  
942 B.B., So.L. and A.-C.P. performed the volatile compound experiment. T.G.  
943 contributed to interpretation and writing; B.B. and J.R. wrote the manuscript, with  
944 contributions from all the authors.

945

946

## 947 References

948 <https://doi.org/10.1016/j.cub.2015.08.025>

949 Adams, D.J., 2004. Fungal cell wall chitinases and glucanases. *Microbiology* 150,  
950 2029–2035. <https://doi.org/10.1099/mic.0.26980-0>

951 Alberto, F.J., Boyer, F., Orozco-terWengel, P., Streeter, I., Servin, B., de  
952 Villemereuil, P., Benjelloun, B., Librado, P., Biscarini, F., Colli, L., Barbato, M.,  
953 Zamani, W., Alberti, A., Engelen, S., Stella, A., Joost, S., Ajmone-Marsan, P.,  
954 Negrini, R., Orlando, L., Rezaei, H.R., Naderi, S., Clarke, L., Flicek, P.,  
955 Wincker, P., Coissac, E., Kijas, J., Tosser-Klopp, G., Chikhi, A., Bruford,  
956 M.W., Taberlet, P., Pompanon, F., 2018. Convergent genomic signatures of  
957 domestication in sheep and goats. *Nat. Commun.* 9, 813.  
958 <https://doi.org/10.1038/s41467-018-03206-y>

959 Almeida, P., Gonçalves, C., Teixeira, S., Libkind, D., Bontrager, M., Masneuf-  
960 Pomarède, I., Albertin, W., Durrens, P., Sherman, D.J., Marullo, P., Todd  
961 Hittinger, C., Gonçalves, P., Sampaio, J.P., 2014. A Gondwanan imprint on  
962 global diversity and domestication of wine and cider yeast *Saccharomyces*  
963 *uvarum*. *Nat. Commun.* 5, 4044. <https://doi.org/10.1038/ncomms5044>

964 Alper, I., Frenette, M., Labrie, S., 2013. Genetic diversity of dairy *Geotrichum*  
965 *candidum* strains revealed by multilocus sequence typing. *Appl. Microbiol.*  
966 *Biotechnol.* 97, 5907–5920. <https://doi.org/10.1007/s00253-013-4776-2>

967 Antipov, D., Korobeynikov, A., McLean, J.S., Pevzner, P.A., 2016. hybridSPAdes: an  
968 algorithm for hybrid assembly of short and long reads. *Bioinformatics* 32,  
969 1009–1015. <https://doi.org/10.1093/bioinformatics/btv688>

970 Baduel, P., Quadrana, L., Hunter, B., Bomblies, K., Colot, V., 2019. Relaxed  
971 purifying selection in autopolyploids drives transposable element over-  
972 accumulation which provides variants for local adaptation. *Nat. Commun.* 10,  
973 5818. <https://doi.org/10.1038/s41467-019-13730-0>

974 Bai, F.-Y., Han, D.-Y., Duan, S.-F., Wang, Q.-M., 2022. The Ecology and Evolution  
975 of the Baker's Yeast *Saccharomyces cerevisiae*. *Genes* 13, 230.  
976 <https://doi.org/10.3390/genes13020230>

977 Barros Lopes, M., Bellon, J.R., Shirley, N.J., Ganter, P.F., 2002. Evidence for  
978 multiple interspecific hybridization in *Saccharomyces sensu stricto* species.  
979 *FEMS Yeast Res.* 1, 323–331. <https://doi.org/10.1111/j.1567-1364.2002.tb00051.x>

981 Benson, G., 1999. Tandem repeats finder: a program to analyze DNA sequences.  
982 *Nucleic Acids Res.* 27, 573–580. <https://doi.org/10.1093/nar/27.2.573>

983 Bigey, F., Segond, D., Friedrich, A., Guezenc, S., Bourgeois, A., Huyghe, L., Agier,  
984 N., Nidelet, T., Sicard, D., 2021. Evidence for Two Main Domestication  
985 Trajectories in *Saccharomyces cerevisiae* Linked to Distinct Bread-Making  
986 Processes. *Curr. Biol.* 31, 722-732.e5.  
987 <https://doi.org/10.1016/j.cub.2020.11.016>

988 Blum, M., Chang, H.-Y., Chuguransky, S., Grego, T., Kandasaamy, S., Mitchell, A.,  
989 Nuka, G., Paysan-Lafosse, T., Qureshi, M., Raj, S., Richardson, L., Salazar,  
990 G.A., Williams, L., Bork, P., Bridge, A., Gough, J., Haft, D.H., Letunic, I.,  
991 Marchler-Bauer, A., Mi, H., Natale, D.A., Necci, M., Orengo, C.A.,

- 992 Pandurangan, A.P., Rivoire, C., Sigrist, C.J.A., Sillitoe, I., Thanki, N., Thomas,  
993 P.D., Tosatto, S.C.E., Wu, C.H., Bateman, A., Finn, R.D., 2021. The InterPro  
994 protein families and domains database: 20 years on. *Nucleic Acids Res.* 49,  
995 D344–D354. <https://doi.org/10.1093/nar/gkaa977>
- 996 Bolger, A.M., Lohse, M., Usadel, B., 2014. Trimmomatic: a flexible trimmer for  
997 Illumina sequence data. *Bioinformatics* 30, 2114–2120.  
998 <https://doi.org/10.1093/bioinformatics/btu170>
- 999 Bonnarne, P., Arfi, K., Dury, C., Helinck, S., Yvon, M., Spinnler, H.-E., 2001. Sulfur  
1000 compound production by *Geotrichum candidum* from l-methionine: importance  
1001 of the transamination step. *FEMS Microbiol. Lett.* 205, 247–252.  
1002 <https://doi.org/10.1111/j.1574-6968.2001.tb10956.x>
- 1003 Borneman, A.R., Forgan, A.H., Kolouchova, R., Fraser, J.A., Schmidt, S.A., 2016.  
1004 Whole Genome Comparison Reveals High Levels of Inbreeding and Strain  
1005 Redundancy Across the Spectrum of Commercial Wine Strains of  
1006 *Saccharomyces cerevisiae*. *G3 GenesGenomesGenetics* 6, 957–971.  
1007 <https://doi.org/10.1534/g3.115.025692>
- 1008 Bougeard, S., Dray, S., 2018. Supervised Multiblock Analysis in R with the ade4  
1009 Package. *J. Stat. Softw.* 86, 1–17. <https://doi.org/10.18637/jss.v086.i01>
- 1010 Boutrou, R., Gueguen, M., 2005. Interests in *Geotrichum candidum* for cheese  
1011 technology. *Int. J. Food Microbiol.* 102, 1–20.  
1012 <https://doi.org/10.1016/j.ijfoodmicro.2004.12.028>
- 1013 Bruen, T.C., Philippe, H., Bryant, D., 2006. A Simple and Robust Statistical Test for  
1014 Detecting the Presence of Recombination. *Genetics* 172, 2665–2681.  
1015 <https://doi.org/10.1534/genetics.105.048975>
- 1016 Cantalapiedra, C.P., Hernández-Plaza, A., Letunic, I., Bork, P., n.d. eggNOG-  
1017 mapper v2: Functional Annotation, Orthology Assignments, and Domain  
1018 Prediction at the Metagenomic Scale 7.
- 1019 Caron, T., Piver, M.L., Péron, A.-C., Lieben, P., Lavigne, R., Brunel, S., Roueyre, D.,  
1020 Place, M., Bonnarne, P., Giraud, T., Branca, A., Landaud, S., Chassard, C.,  
1021 2021. Strong effect of *Penicillium roqueforti* populations on volatile and  
1022 metabolic compounds responsible for aromas, flavor and texture in blue  
1023 cheeses. *Int. J. Food Microbiol.* 354, 109174.  
1024 <https://doi.org/10.1016/j.ijfoodmicro.2021.109174>
- 1025 Carreira, A., Dillinger, K., Eliskases-Lechner, F., Loureiro, V., Ginzinger, W., Rohm,  
1026 H., 2002. Influence of selected factors on browning of Camembert cheese. *J.*  
1027 *Dairy Res.* 69, 281–292. <https://doi.org/10.1017/S0022029902005393>
- 1028 Cheeseman, K., Ropars, J., Renault, P., Dupont, J., Gouzy, J., Branca, A., Abraham,  
1029 A.-L., Ceppi, M., Conseiller, E., Debuchy, R., Malagnac, F., Goarin, A., Silar,  
1030 P., Lacoste, S., Sallet, E., Bensimon, A., Giraud, T., Brygoo, Y., 2014. Multiple  
1031 recent horizontal transfers of a large genomic region in cheese making fungi.  
1032 *Nat. Commun.* 5, 1–9. <https://doi.org/10.1038/ncomms3876>
- 1033 Chessel, D., Dufour, A.-B., Thioulouse, J., 2004. The ade4 Package – I: One-Table  
1034 Methods. *R News* 4, 5–10.
- 1035 Cingolani, P., Platts, A., Wang, L.L., Coon, M., Nguyen, T., Wang, L., Land, S.J., Lu,  
1036 X., Ruden, D.M., 2012. A program for annotating and predicting the effects of  
1037 single nucleotide polymorphisms, SnpEff: SNPs in the genome of *Drosophila*  
1038 *melanogaster* strain w<sup>1118</sup>; iso-2; iso-3. *Fly (Austin)* 6, 80–92.  
1039 <https://doi.org/10.4161/fly.19695>
- 1040 Collins, Y.F., McSweeney, P.L.H., Wilkinson, M.G., 2003. Lipolysis and free fatty  
1041 acid catabolism in cheese: a review of current knowledge. *Int. Dairy J.* 13,

- 1042 841–866. [https://doi.org/10.1016/S0958-6946\(03\)00109-2](https://doi.org/10.1016/S0958-6946(03)00109-2)
- 1043 Cornille, A., Giraud, T., Smulders, M.J.M., Roldán-Ruiz, I., Gladieux, P., 2014. The  
1044 domestication and evolutionary ecology of apples. *Trends Genet.* 30, 57–65.  
1045 <https://doi.org/10.1016/j.tig.2013.10.002>
- 1046 Cresko, W.A., Amores, A., Wilson, C., Murphy, J., Currey, M., Phillips, P., Bell, M.A.,  
1047 Kimmel, C.B., Postlethwait, J.H., 2004. Parallel genetic basis for repeated  
1048 evolution of armor loss in Alaskan threespine stickleback populations. *Proc.*  
1049 *Natl. Acad. Sci.* 101, 6050–6055. <https://doi.org/10.1073/pnas.0308479101>
- 1050 Crusoe, M.R., Alameldin, H.F., Awad, S., Boucher, E., Caldwell, A., Cartwright, R.,  
1051 Charbonneau, A., Constantinides, B., Edverson, G., Fay, S., Fenton, J.,  
1052 Fenzl, T., Fish, J., Garcia-Gutierrez, L., Garland, P., Gluck, J., González, I.,  
1053 Guermond, S., Guo, J., Gupta, A., Herr, J.R., Howe, A., Hyer, A., Härpfer, A.,  
1054 Irber, L., Kidd, R., Lin, D., Lippi, J., Mansour, T., McA’Nulty, P., McDonald, E.,  
1055 Mizzi, J., Murray, K.D., Nahum, J.R., Nanlohy, K., Nederbragt, A.J., Ortiz-  
1056 Zuazaga, H., Ory, J., Pell, J., Pepe-Ranney, C., Russ, Z.N., Schwarz, E.,  
1057 Scott, C., Seaman, J., Sievert, S., Simpson, J., Skenneron, C.T., Spencer, J.,  
1058 Srinivasan, R., Standage, D., Stapleton, J.A., Steinman, S.R., Stein, J.,  
1059 Taylor, B., Trimble, W., Wiencko, H.L., Wright, M., Wyss, B., Zhang, Q., Zyme,  
1060 en, Brown, C.T., 2015. The khmer software package: enabling efficient  
1061 nucleotide sequence analysis. *F1000Research* 4, 900.  
1062 <https://doi.org/10.12688/f1000research.6924.1>
- 1063 Curioni, P.M.G., Bosset, J.O., 2002. Key odorants in various cheese types as  
1064 determined by gas chromatography-olfactometry. *Int. Dairy J.* 12, 959–984.  
1065 [https://doi.org/10.1016/S0958-6946\(02\)00124-3](https://doi.org/10.1016/S0958-6946(02)00124-3)
- 1066 Diamond, J., 2002. Evolution, consequences and future of plant and animal  
1067 domestication. *Nature* 418, 700–707. <https://doi.org/10.1038/nature01019>
- 1068 Dieuleveux, V., Van Der Pyl, D., Chataud, J., Gueguen, M., 1998. Purification and  
1069 characterization of anti-Listeria compounds produced by *Geotrichum*  
1070 *candidum*. *Appl. Environ. Microbiol.* 64, 800–803.  
1071 <https://doi.org/10.1128/AEM.64.2.800-803.1998>
- 1072 Dray, S., Dufour, A.-B., 2007. The ade4 Package: Implementing the Duality Diagram  
1073 for Ecologists. *J. Stat. Softw.* 22, 1–20. <https://doi.org/10.18637/jss.v022.i04>
- 1074 Dray, S., Dufour, A.-B., Chessel, D., 2007. The ade4 Package – II: Two-Table and K-  
1075 Table Methods. *R News* 7, 47–52.
- 1076 Duan, S.-F., Han, P.-J., Wang, Q.-M., Liu, W.-Q., Shi, J.-Y., Li, K., Zhang, X.-L., Bai,  
1077 F.-Y., 2018. The origin and adaptive evolution of domesticated populations of  
1078 yeast from Far East Asia. *Nat. Commun.* 9, 2690.  
1079 <https://doi.org/10.1038/s41467-018-05106-7>
- 1080 Dugat-Bony, E., Straub, C., Teissandier, A., Onésime, D., Loux, V., Monnet, C.,  
1081 Irlinger, F., Landaud, S., Leclercq-Perlat, M.-N., Bento, P., Fraud, S., Gibrat,  
1082 J.-F., Aubert, J., Fer, F., Guédon, E., Pons, N., Kennedy, S., Beckerich, J.-M.,  
1083 Swennen, D., Bonnarme, P., 2015. Overview of a Surface-Ripened Cheese  
1084 Community Functioning by Meta-Omics Analyses. *PLOS ONE* 10, e0124360.  
1085 <https://doi.org/10.1371/journal.pone.0124360>
- 1086 Dumas, E., Feurtey, A., Rodríguez de la Vega, R.C., Le Prieur, S., Snirc, A., Coton,  
1087 M., Thierry, A., Coton, E., Le Piver, M., Roueyre, D., Ropars, J., Branca, A.,  
1088 Giraud, T., 2020. Independent domestication events in the blue-cheese  
1089 fungus *Penicillium roqueforti*. *Mol. Ecol.* 29, 2639–2660.  
1090 <https://doi.org/10.1111/mec.15359>
- 1091 Dyer, A.G., Boyd-Gerny, S., McLoughlin, S., Rosa, M.G.P., Simonov, V., Wong,



- 1092 B.B.M., 2012. Parallel evolution of angiosperm colour signals: common  
1093 evolutionary pressures linked to hymenopteran vision. *Proc. R. Soc. B Biol.*  
1094 *Sci.* 279, 3606–3615. <https://doi.org/10.1098/rspb.2012.0827>
- 1095 Eddy, S.R., 2011. Accelerated Profile HMM Searches. *PLoS Comput. Biol.* 7,  
1096 e1002195. <https://doi.org/10.1371/journal.pcbi.1002195>
- 1097 Ekseth, O.K., Kuiper, M., Mironov, V., 2014. orthAgogue: an agile tool for the rapid  
1098 prediction of orthology relations. *Bioinformatics* 30, 734–736.  
1099 <https://doi.org/10.1093/bioinformatics/btt582>
- 1100 Elmer, K.R., Fan, S., Kusche, H., Spreitzer, M.L., Kautt, A.F., Franchini, P., Meyer,  
1101 A., 2014. Parallel evolution of Nicaraguan crater lake cichlid fishes via non-  
1102 parallel routes. *Nat. Commun.* 5, 1–8. <https://doi.org/10.1038/ncomms6168>
- 1103 Elmer, K.R., Kusche, H., Lehtonen, T.K., Meyer, A., 2010. Local variation and  
1104 parallel evolution: morphological and genetic diversity across a species  
1105 complex of neotropical crater lake cichlid fishes. *Philos. Trans. R. Soc. B Biol.*  
1106 *Sci.* 365, 1763–1782. <https://doi.org/10.1098/rstb.2009.0271>
- 1107 Fay, J.C., Benavides, J.A., 2005. Evidence for Domesticated and Wild Populations of  
1108 *Saccharomyces cerevisiae*. *PLoS Genet.* 1, e5.  
1109 <https://doi.org/10.1371/journal.pgen.0010005>
- 1110 Felsenstein, J., 1974. The evolutionary advantage of recombination. *Genetics* 78,  
1111 737–756. <https://doi.org/10.1093/genetics/78.2.737>
- 1112 Flynn, J.M., Hubley, R., Goubert, C., Rosen, J., Clark, A.G., Feschotte, C., Smit,  
1113 A.F., 2020. RepeatModeler2 for automated genomic discovery of  
1114 transposable element families. *Proc. Natl. Acad. Sci. U. S. A.* 117, 9451–  
1115 9457. <https://doi.org/10.1073/pnas.1921046117>
- 1116 Frantz, L.A.F., Schraiber, J.G., Madsen, O., Megens, H.-J., Cagan, A., Bosse, M.,  
1117 Paudel, Y., Crooijmans, R.P.M.A., Larson, G., Groenen, M.A.M., 2015.  
1118 Evidence of long-term gene flow and selection during domestication from  
1119 analyses of Eurasian wild and domestic pig genomes. *Nat. Genet.* 47, 1141–  
1120 1148. <https://doi.org/10.1038/ng.3394>
- 1121 Galagan, J.E., Calvo, S.E., Cuomo, C., Ma, L.-J., Wortman, J.R., Batzoglou, S., Lee,  
1122 S.-I., Baştürkmen, M., Spevak, C.C., Clutterbuck, J., Kapitonov, V., Jurka, J.,  
1123 Scazzocchio, C., Farman, M., Butler, J., Purcell, S., Harris, S., Braus, G.H.,  
1124 Draht, O., Busch, S., D’Enfert, C., Bouchier, C., Goldman, G.H., Bell-  
1125 Pedersen, D., Griffiths-Jones, S., Doonan, J.H., Yu, J., Vienken, K., Pain, A.,  
1126 Freitag, M., Selker, E.U., Archer, D.B., Peñalva, M.Á., Oakley, B.R., Momany,  
1127 M., Tanaka, T., Kumagai, T., Asai, K., Machida, M., Nierman, W.C., Denning,  
1128 D.W., Caddick, M., Hynes, M., Paoletti, M., Fischer, R., Miller, B., Dyer, P.,  
1129 Sachs, M.S., Osmani, S.A., Birren, B.W., 2005. Sequencing of *Aspergillus*  
1130 *nidulans* and comparative analysis with *A. fumigatus* and *A. oryzae*. *Nature*  
1131 438, 1105–1115. <https://doi.org/10.1038/nature04341>
- 1132 Gallone, B., Mertens, S., Gordon, J.L., Maere, S., Verstrepen, K.J., Steensels, J.,  
1133 2018. Origins, evolution, domestication and diversity of *Saccharomyces* beer  
1134 yeasts. *Curr. Opin. Biotechnol.* 49, 148–155.  
1135 <https://doi.org/10.1016/j.copbio.2017.08.005>
- 1136 Gallone, B., Steensels, J., Prahl, T., Soriaga, L., Saels, V., Herrera-Malaver, B.,  
1137 Merlevede, A., Roncoroni, M., Voordeckers, K., Miraglia, L., Teiling, C., Steffy,  
1138 B., Taylor, M., Schwartz, A., Richardson, T., White, C., Baele, G., Maere, S.,  
1139 Verstrepen, K.J., 2016. Domestication and Divergence of *Saccharomyces*  
1140 *cerevisiae* Beer Yeasts. *Cell* 166, 1397–1410.e16.  
1141 <https://doi.org/10.1016/j.cell.2016.08.020>

- 1142 Gao, M., Glenn, A.E., Blacutt, A.A., Gold, S.E., 2017. Fungal Lactamases: Their  
1143 Occurrence and Function. *Front. Microbiol.* 8.
- 1144 Giannakou, K., Cotterrell, M., Delneri, D., 2020. Genomic Adaptation of  
1145 *Saccharomyces* Species to Industrial Environments. *Front. Genet.* 11.
- 1146 Gibbons, J.G., Salichos, L., Slot, J.C., Rinker, D.C., McGary, K.L., King, J.G., Klich,  
1147 M.A., Tabb, D.L., McDonald, W.H., Rokas, A., 2012. The Evolutionary Imprint  
1148 of Domestication on Genome Variation and Function of the Filamentous  
1149 Fungus *Aspergillus oryzae*. *Curr. Biol.* 22, 1403–1409.  
1150 <https://doi.org/10.1016/j.cub.2012.05.033>
- 1151 Gillot, G., Jany, J.-L., Poirier, E., Maillard, M.-B., Debaets, S., Thierry, A., Coton, E.,  
1152 Coton, M., 2017. Functional diversity within the *Penicillium roqueforti* species.  
1153 *Int. J. Food Microbiol.* 241, 141–150.  
1154 <https://doi.org/10.1016/j.ijfoodmicro.2016.10.001>
- 1155 Gladieux, P., Ropars, J., Badouin, H., Branca, A., Aguileta, G., Vienne, D.M.,  
1156 Rodríguez de la Vega, R.C., Branco, S., Giraud, T., 2014. Fungal evolutionary  
1157 genomics provides insight into the mechanisms of adaptive divergence in  
1158 eukaryotes. *Mol. Ecol.* 23, 753–773. <https://doi.org/10.1111/mec.12631>
- 1159 Gonçalves, M., Pontes, A., Almeida, P., Barbosa, R., Serra, M., Libkind, D., Hutzler,  
1160 M., Gonçalves, P., Sampaio, J.P., 2016. Distinct Domestication Trajectories in  
1161 Top-Fermenting Beer Yeasts and Wine Yeasts. *Curr. Biol.* CB 26, 2750–2761.  
1162 <https://doi.org/10.1016/j.cub.2016.08.040>
- 1163 Goubert, C., Craig, R.J., Bilat, A.F., Peona, V., Vogan, A.A., Protasio, A.V., 2022. A  
1164 beginner's guide to manual curation of transposable elements. *Mob. DNA* 13,  
1165 7. <https://doi.org/10.1186/s13100-021-00259-7>
- 1166 Harlan, J.R., Gepts, P., Famula, T.R., Bettinger, R.L., Brush, S.B., Damania, A.B.,  
1167 McGuire, P.E., Qualset, C.O., 2012. Biodiversity in agriculture: domestication,  
1168 evolution, and sustainability. Cambridge University Press.
- 1169 Huang, L., Zhang, H., Wu, P., Entwistle, S., Li, X., Yohe, T., Yi, H., Yang, Z., Yin, Y.,  
1170 2018. dbCAN-seq: a database of carbohydrate-active enzyme (CAZyme)  
1171 sequence and annotation. *Nucleic Acids Res.* 46, D516–D521.  
1172 <https://doi.org/10.1093/nar/gkx894>
- 1173 Hudson, R.R., Slatkin, M., Maddison, W.P., 1992. Estimation of levels of gene flow  
1174 from DNA sequence data. *Genetics* 132, 583–589.  
1175 <https://doi.org/10.1093/genetics/132.2.583>
- 1176 Huerta-Cepas, J., Szklarczyk, D., Heller, D., Hernández-Plaza, A., Forslund, S.K.,  
1177 Cook, H., Mende, D.R., Letunic, I., Rattei, T., Jensen, L.J., von Mering, C.,  
1178 Bork, P., 2019. eggNOG 5.0: a hierarchical, functionally and phylogenetically  
1179 annotated orthology resource based on 5090 organisms and 2502 viruses.  
1180 *Nucleic Acids Res.* 47, D309–D314. <https://doi.org/10.1093/nar/gky1085>
- 1181 Hufford, M.B., Xu, X., van Heerwaarden, J., Pyhäjärvi, T., Chia, J.-M., Cartwright,  
1182 R.A., Elshire, R.J., Glaubitz, J.C., Guill, K.E., Kaeppeler, S.M., Lai, J., Morrell,  
1183 P.L., Shannon, L.M., Song, C., Springer, N.M., Swanson-Wagner, R.A., Tiffin,  
1184 P., Wang, J., Zhang, G., Doebley, J., McMullen, M.D., Ware, D., Buckler,  
1185 E.S., Yang, S., Ross-Ibarra, J., 2012. Comparative population genomics of  
1186 maize domestication and improvement. *Nat. Genet.* 44, 808–811.  
1187 <https://doi.org/10.1038/ng.2309>
- 1188 Huson, D.H., Bryant, D., 2006. Application of Phylogenetic Networks in Evolutionary  
1189 Studies. *Mol. Biol. Evol.* 23, 254–267. <https://doi.org/10.1093/molbev/msj030>
- 1190 Jacques, N., Mallet, S., Laaghouti, F., Tinsley, C.R., Casaregola, S., 2017. Specific  
1191 populations of the yeast *Geotrichum candidum* revealed by molecular typing.

- 1192 Yeast 34, 165–178. <https://doi.org/10.1002/yea.3223>
- 1193 Jørsboe, E., Hanghøj, K., Albrechtsen, A., 2017. fastNGSadmix: admixture  
1194 proportions and principal component analysis of a single NGS sample.  
1195 Bioinformatics 33, 3148–3150. <https://doi.org/10.1093/bioinformatics/btx474>
- 1196 Koren, S., Walenz, B.P., Berlin, K., Miller, J.R., Bergman, N.H., Phillippy, A.M., 2017.  
1197 Canu: scalable and accurate long-read assembly via adaptive *k*-mer  
1198 weighting and repeat separation. Genome Res. 27, 722–736.  
1199 <https://doi.org/10.1101/gr.215087.116>
- 1200 Korneliussen, T.S., Albrechtsen, A., Nielsen, R., 2014. ANGSD: Analysis of Next  
1201 Generation Sequencing Data. BMC Bioinformatics 15, 356.  
1202 <https://doi.org/10.1186/s12859-014-0356-4>
- 1203 Kritikos, G., Banzhaf, M., Herrera-Dominguez, L., Koumoutsi, A., Wartel, M., Zietek,  
1204 M., Typas, A., 2017. A tool named Iris for versatile high-throughput  
1205 phenotyping in microorganisms 24.
- 1206 KUMURA, H., TAKAGAKI, K., SONE, T., TSUKAHARA, M., TANAKA, T.,  
1207 SHIMAZAKI, K., 2002. Casein Digestion by *Debaryomyces hansenii* Isolated  
1208 from Cheese. Biosci. Biotechnol. Biochem. 66, 1370–1373.  
1209 <https://doi.org/10.1271/bbb.66.1370>
- 1210 Lahue, C., Madden, A., Dunn, R., Smukowski Heil, C., 2020. History and  
1211 Domestication of *Saccharomyces cerevisiae* in Bread Baking. Front. Genet.  
1212 11.
- 1213 Langmead, B., Salzberg, S.L., 2012. Fast gapped-read alignment with Bowtie 2. Nat.  
1214 Methods 9, 357–359. <https://doi.org/10.1038/nmeth.1923>
- 1215 Legras, J.-L., Galeote, V., Bigey, F., Camarasa, C., Marsit, S., Nidelet, T., Sanchez,  
1216 I., Couloux, A., Guy, J., Franco-Duarte, R., Marcet-Houben, M., Gabaldon, T.,  
1217 Schuller, D., Sampaio, J.P., Dequin, S., 2018. Adaptation of *S. cerevisiae* to  
1218 Fermented Food Environments Reveals Remarkable Genome Plasticity and  
1219 the Footprints of Domestication. Mol. Biol. Evol. 35, 1712–1727.  
1220 <https://doi.org/10.1093/molbev/msy066>
- 1221 Li, H., 2013. Aligning sequence reads, clone sequences and assembly contigs with  
1222 BWA-MEM (No. arXiv:1303.3997). arXiv.  
1223 <https://doi.org/10.48550/arXiv.1303.3997>
- 1224 Li, H., Handsaker, B., Wysoker, A., Fennell, T., Ruan, J., Homer, N., Marth, G.,  
1225 Abecasis, G., Durbin, R., 1000 Genome Project Data Processing Subgroup,  
1226 2009. The Sequence Alignment/Map format and SAMtools. Bioinformatics 25,  
1227 2078–2079. <https://doi.org/10.1093/bioinformatics/btp352>
- 1228 Libkind, D., Hittinger, C.T., Valério, E., Gonçalves, C., Dover, J., Johnston, M.,  
1229 Gonçalves, P., Sampaio, J.P., 2011. Microbe domestication and the  
1230 identification of the wild genetic stock of lager-brewing yeast. Proc. Natl.  
1231 Acad. Sci. 108, 14539–14544. <https://doi.org/10.1073/pnas.1105430108>
- 1232 Lin, Z., Li, X., Shannon, L.M., Yeh, C.T., Wang, M.L., Bai, G., Peng, Z., Li, J., Trick,  
1233 H.N., Clemente, T.E., Doebley, J., Schnable, P.S., Tuinstra, M.R., Tesso,  
1234 T.T., White, F., Yu, J., 2012. Parallel domestication of the Shattering1 genes  
1235 in cereals. Nat. Genet. 44, 720–724. <https://doi.org/10.1038/ng.2281>
- 1236 Liti, G., Carter, D.M., Moses, A.M., Warringer, J., Parts, L., James, S.A., Davey,  
1237 R.P., Roberts, I.N., Burt, A., Koufopanou, V., Tsai, I.J., Bergman, C.M.,  
1238 Bensasson, D., O'Kelly, M.J.T., van Oudenaarden, A., Barton, D.B.H., Bailes,  
1239 E., Nguyen, A.N., Jones, M., Quail, M.A., Goodhead, I., Sims, S., Smith, F.,  
1240 Blomberg, A., Durbin, R., Louis, E.J., 2009. Population genomics of domestic  
1241 and wild yeasts. Nature 458, 337–341. <https://doi.org/10.1038/nature07743>

- 1242 Liu, S.-Q., Holland, R., Crow, V.L., 2004. Esters and their biosynthesis in fermented  
1243 dairy products: a review. *Int. Dairy J.* 14, 923–945.  
1244 <https://doi.org/10.1016/j.idairyj.2004.02.010>
- 1245 Liu, X., Zhang, Y., Liu, W., Li, Y., Pan, J., Pu, Y., Han, J., Orlando, L., Ma, Y., Jiang,  
1246 L., 2022. A single-nucleotide mutation within the TBX3 enhancer increased  
1247 body size in Chinese horses. *Curr. Biol.* 32, 480-487.e6.  
1248 <https://doi.org/10.1016/j.cub.2021.11.052>
- 1249 Lo, Y.-C., Bruxaux, J., Vega, R.C.R. de la, Snirc, A., Coton, M., Piver, M.L., Prieur,  
1250 S.L., Roueyre, D., Dupont, J., Houbraken, J., Debuchy, R., Ropars, J., Giraud,  
1251 T., Branca, A., 2022. Domestication in dry-cured meat *Penicillium* fungi:  
1252 convergent specific phenotypes and horizontal gene transfers without strong  
1253 genetic subdivision. <https://doi.org/10.1101/2022.03.25.485132>
- 1254 Mabry, M.E., Turner-Hissong, S.D., Gallagher, E.Y., McAlvay, A.C., An, H., Edger,  
1255 P.P., Moore, J.D., Pink, D.A.C., Teakle, G.R., Stevens, C.J., Barker, G.,  
1256 Labate, J., Fuller, D.Q., Allaby, R.G., Beissinger, T., Decker, J.E., Gore, M.A.,  
1257 Pires, J.C., 2021. The Evolutionary History of Wild, Domesticated, and Feral  
1258 *Brassica oleracea* (Brassicaceae). *Mol. Biol. Evol.* 38, 4419–4434.  
1259 <https://doi.org/10.1093/molbev/msab183>
- 1260 Machida, M., Asai, K., Sano, M., Tanaka, T., Kumagai, T., Terai, G., Kusumoto, K.-I.,  
1261 Arima, T., Akita, O., Kashiwagi, Y., Abe, K., Gomi, K., Horiuchi, H., Kitamoto,  
1262 K., Kobayashi, T., Takeuchi, M., Denning, D.W., Galagan, J.E., Nierman,  
1263 W.C., Yu, J., Archer, D.B., Bennett, J.W., Bhatnagar, D., Cleveland, T.E.,  
1264 Fedorova, N.D., Gotoh, O., Horikawa, H., Hosoyama, A., Ichinomiya, M.,  
1265 Igarashi, R., Iwashita, K., Juvvadi, P.R., Kato, M., Kato, Y., Kin, T., Kokubun,  
1266 A., Maeda, H., Maeyama, N., Maruyama, J., Nagasaki, H., Nakajima, T., Oda,  
1267 K., Okada, K., Paulsen, I., Sakamoto, K., Sawano, T., Takahashi, M., Takase,  
1268 K., Terabayashi, Y., Wortman, J.R., Yamada, O., Yamagata, Y., Anazawa, H.,  
1269 Hata, Y., Koide, Y., Komori, T., Koyama, Y., Minetoki, T., Suharnan, S.,  
1270 Tanaka, A., Isono, K., Kuhara, S., Ogasawara, N., Kikuchi, H., 2005. Genome  
1271 sequencing and analysis of *Aspergillus oryzae*. *Nature* 438, 1157–1161.  
1272 <https://doi.org/10.1038/nature04300>
- 1273 Macías, L.G., Flores, M.G., Adam, A.C., Rodríguez, M.E., Querol, A., Barrio, E.,  
1274 Lopes, C.A., Pérez-Torrado, R., 2021. Convergent adaptation of  
1275 *Saccharomyces uvarum* to sulfite, an antimicrobial preservative widely used in  
1276 human-driven fermentations. *PLOS Genet.* 17, e1009872.  
1277 <https://doi.org/10.1371/journal.pgen.1009872>
- 1278 Marsden, C.D., Ortega-Del Vecchyo, D., O'Brien, D.P., Taylor, J.F., Ramirez, O.,  
1279 Vilà, C., Marques-Bonet, T., Schnabel, R.D., Wayne, R.K., Lohmueller, K.E.,  
1280 2016. Bottlenecks and selective sweeps during domestication have increased  
1281 deleterious genetic variation in dogs. *Proc. Natl. Acad. Sci.* 113, 152–157.  
1282 <https://doi.org/10.1073/pnas.1512501113>
- 1283 Mayo, B., Rodríguez, J., Vázquez, L., Flórez, A.B., 2021. Microbial Interactions  
1284 within the Cheese Ecosystem and Their Application to Improve Quality and  
1285 Safety. *Foods* 10, 602. <https://doi.org/10.3390/foods10030602>
- 1286 McSweeney, P.L.H., 2004. Biochemistry of cheese ripening. *Int. J. Dairy Technol.*  
1287 57, 127–144. <https://doi.org/10.1111/j.1471-0307.2004.00147.x>
- 1288 Minh, B.Q., Nguyen, M.A.T., von Haeseler, A., 2013. Ultrafast Approximation for  
1289 Phylogenetic Bootstrap. *Mol. Biol. Evol.* 30, 1188–1195.  
1290 <https://doi.org/10.1093/molbev/mst024>
- 1291 Minh, B.Q., Schmidt, H.A., Chernomor, O., Schrempf, D., Woodhams, M.D., von

- 1292 Haeseler, A., Lanfear, R., 2020. IQ-TREE 2: New Models and Efficient  
1293 Methods for Phylogenetic Inference in the Genomic Era. *Mol. Biol. Evol.* 37,  
1294 1530–1534. <https://doi.org/10.1093/molbev/msaa015>
- 1295 Mistry, J., Chuguransky, S., Williams, L., Qureshi, M., Salazar, G.A., Sonnhammer,  
1296 E.L.L., Tosatto, S.C.E., Paladin, L., Raj, S., Richardson, L.J., Finn, R.D.,  
1297 Bateman, A., 2021. Pfam: The protein families database in 2021. *Nucleic  
1298 Acids Res.* 49, D412–D419. <https://doi.org/10.1093/nar/gkaa913>
- 1299 Monnet, C., Back, A., Irlinger, F., 2012. Growth of Aerobic Ripening Bacteria at the  
1300 Cheese Surface Is Limited by the Availability of Iron. *Appl. Environ. Microbiol.*  
1301 78, 3185–3192. <https://doi.org/10.1128/AEM.00085-12>
- 1302 Monnet, C., Landaud, S., Bonnarme, P., Swennen, D., 2015. Growth and adaptation  
1303 of microorganisms on the cheese surface. *FEMS Microbiol. Lett.* 362, 1–9.  
1304 <https://doi.org/10.1093/femsle/fnu025>
- 1305 Morel, G., Sterck, L., Swennen, D., Marcet-Houben, M., Onesime, D., Levasseur, A.,  
1306 Jacques, N., Mallet, S., Couloux, A., Labadie, K., Amselem, J., Beckerich, J.-  
1307 M., Henrissat, B., Van de Peer, Y., Wincker, P., Souciet, J.-L., Gabaldón, T.,  
1308 Tinsley, C.R., Casaregola, S., 2015. Differential gene retention as an  
1309 evolutionary mechanism to generate biodiversity and adaptation in yeasts.  
1310 *Sci. Rep.* 5, 11571. <https://doi.org/10.1038/srep11571>
- 1311 Naumova, E.S., Naumov, G.I., Masneuf-Pomarède, I., Aigle, M., Dubourdiou, D.,  
1312 2005. Molecular genetic study of introgression between *Saccharomyces*  
1313 *bayanus* and *S. cerevisiae*. *Yeast* 22, 1099–1115.  
1314 <https://doi.org/10.1002/yea.1298>
- 1315 Nei, M., Li, W.H., 1979. Mathematical model for studying genetic variation in terms of  
1316 restriction endonucleases. *Proc. Natl. Acad. Sci. U. S. A.* 76, 5269–5273.
- 1317 Nielsen, M.S., Frisvad, J.C., Nielsen, P.V., 1998. Colony interaction and secondary  
1318 metabolite production of cheese-related fungi in dual culture. *J. Food Prot.* 61,  
1319 1023–1029. <https://doi.org/10.4315/0362-028X-61.8.1023>
- 1320 Novo, M., Bigey, F., Beyne, E., Galeote, V., Gavory, F., Mallet, S., Cambon, B.,  
1321 Legras, J.-L., Wincker, P., Casaregola, S., Dequin, S., 2009. Eukaryote-to-  
1322 eukaryote gene transfer events revealed by the genome sequence of the wine  
1323 yeast *Saccharomyces cerevisiae* EC1118. *Proc. Natl. Acad. Sci.* 106, 16333–  
1324 16338. <https://doi.org/10.1073/pnas.0904673106>
- 1325 Omeike, S.O., Kareem, S.O., Nandanwar, H., Lasisi, A.A., Oluwafemi, F., Jangra,  
1326 M., 2021. Purification, De Novo Characterization and Antibacterial Properties  
1327 of a Novel, Narrow-Spectrum Bacteriostatic Tripeptide from *Geotrichum*  
1328 *candidum* OMON-1. *Arab. J. Sci. Eng.* 46, 5275–5283.  
1329 <https://doi.org/10.1007/s13369-020-05024-1>
- 1330 O'Quin, K.E., Hofmann, C.M., Hofmann, H.A., Carleton, K.L., 2010. Parallel  
1331 Evolution of Opsin Gene Expression in African Cichlid Fishes. *Mol. Biol. Evol.*  
1332 27, 2839–2854. <https://doi.org/10.1093/molbev/msq171>
- 1333 Peng, J.H., Sun, D., Nevo, E., 2011. Domestication evolution, genetics and  
1334 genomics in wheat. *Mol. Breed.* 28, 281. <https://doi.org/10.1007/s11032-011-9608-4>
- 1335  
1336 Penland, M., Falentin, H., Parayre, S., Pawtowski, A., Maillard, M.-B., Thierry, A.,  
1337 Mounier, J., Coton, M., Deutsch, S.-M., 2021. Linking Pélardon artisanal goat  
1338 cheese microbial communities to aroma compounds during cheese-making  
1339 and ripening. *Int. J. Food Microbiol.* 345, 109130.  
1340 <https://doi.org/10.1016/j.ijfoodmicro.2021.109130>
- 1341 Perkins, V., Vignola, S., Lessard, M.-H., Plante, P.-L., Corbeil, J., Dugat-Bony, E.,

- 1342 Frenette, M., Labrie, S., 2020. Phenotypic and Genetic Characterization of the  
1343 Cheese Ripening Yeast *Geotrichum candidum*. *Front. Microbiol.* 11.  
1344 <https://doi.org/10.3389/fmicb.2020.00737>
- 1345 Peter, J., De Chiara, M., Friedrich, A., Yue, J.-X., Pflieger, D., Bergström, A., Sigwalt,  
1346 A., Barre, B., Freel, K., Llored, A., Cruaud, C., Labadie, K., Aury, J.-M., Istace,  
1347 B., Lebrigand, K., Barbry, P., Engelen, S., Lemainque, A., Wincker, P., Liti, G.,  
1348 Schacherer, J., 2018. Genome evolution across 1,011 *Saccharomyces*  
1349 *cerevisiae* isolates. *Nature* 556, 339–344. [https://doi.org/10.1038/s41586-018-](https://doi.org/10.1038/s41586-018-0030-5)  
1350 0030-5
- 1351 Petersen, J.L., Mickelson, J.R., Rendahl, A.K., Valberg, S.J., Andersson, L.S.,  
1352 Axelsson, J., Bailey, E., Bannasch, D., Binns, M.M., Borges, A.S., Brama, P.,  
1353 da Câmara Machado, A., Capomaccio, S., Cappelli, K., Cothran, E.G., Distl,  
1354 O., Fox-Clipsham, L., Graves, K.T., Guérin, G., Haase, B., Hasegawa, T.,  
1355 Hemmann, K., Hill, E.W., Leeb, T., Lindgren, G., Lohi, H., Lopes, M.S.,  
1356 McGivney, B.A., Mikko, S., Orr, N., Penedo, M.C.T., Piercy, R.J., Raekallio,  
1357 M., Rieder, S., Røed, K.H., Swinburne, J., Tozaki, T., Vaudin, M., Wade,  
1358 C.M., McCue, M.E., 2013. Genome-Wide Analysis Reveals Selection for  
1359 Important Traits in Domestic Horse Breeds. *PLoS Genet.* 9, e1003211.  
1360 <https://doi.org/10.1371/journal.pgen.1003211>
- 1361 Pfeifer, B., Wittelsbürger, U., Ramos-Onsins, S.E., Lercher, M.J., 2014.  
1362 PopGenome: An Efficient Swiss Army Knife for Population Genomic Analyses  
1363 in R. *Mol. Biol. Evol.* 31, 1929–1936. <https://doi.org/10.1093/molbev/msu136>
- 1364 Pitt, J.I., Cruickshank, R.H., Leistner, L., 1986. *Penicillium commune*, P.  
1365 *camembertii*, the origin of white cheese moulds, and the production of  
1366 cyclopiazonic acid. *Food Microbiol.* 3, 363–371. [https://doi.org/10.1016/0740-](https://doi.org/10.1016/0740-0020(86)90022-5)  
1367 0020(86)90022-5
- 1368 Plassais, J., vonHoldt, B.M., Parker, H.G., Carmagnini, A., Dubos, N., Papa, I.,  
1369 Bevant, K., Derrien, T., Hennelly, L.M., Whitaker, D.T., Harris, A.C., Hogan,  
1370 A.N., Huson, H.J., Zaibert, V.F., Linderholm, A., Haile, J., Fest, T., Habib, B.,  
1371 Sacks, B.N., Benecke, N., Outram, A.K., Sablin, M.V., Germonpré, M.,  
1372 Larson, G., Frantz, L., Ostrander, E.A., 2022. Natural and human-driven  
1373 selection of a single non-coding body size variant in ancient and modern  
1374 canids. *Curr. Biol.* 32, 889–897.e9. <https://doi.org/10.1016/j.cub.2021.12.036>
- 1375 Price, E.O. (Ed.), 2002. *Animal domestication and behavior*. CABI, Wallingford.  
1376 <https://doi.org/10.1079/9780851995977.0000>
- 1377 Prjibelski, A., Antipov, D., Meleshko, D., Lapidus, A., Korobeynikov, A., 2020. Using  
1378 SPAdes De Novo Assembler. *Curr. Protoc. Bioinforma.* 70, e102.  
1379 <https://doi.org/10.1002/cpbi.102>
- 1380 Purugganan, M.D., 2019. Evolutionary Insights into the Nature of Plant  
1381 Domestication. *Curr. Biol.* 29, R705–R714.  
1382 <https://doi.org/10.1016/j.cub.2019.05.053>
- 1383 Qanbari, S., Pausch, H., Jansen, S., Somel, M., Strom, T.M., Fries, R., Nielsen, R.,  
1384 Simianer, H., 2014. Classic Selective Sweeps Revealed by Massive  
1385 Sequencing in Cattle. *PLOS Genet.* 10, e1004148.  
1386 <https://doi.org/10.1371/journal.pgen.1004148>
- 1387 Rainieri, S., Kodama, Y., Kaneko, Y., Mikata, K., Nakao, Y., Ashikari, T., 2006. Pure  
1388 and Mixed Genetic Lines of *Saccharomyces bayanus* and *Saccharomyces*  
1389 *pastorianus* and Their Contribution to the Lager Brewing Strain Genome.  
1390 *Appl. Environ. Microbiol.* 72, 3968–3974. [https://doi.org/10.1128/AEM.02769-](https://doi.org/10.1128/AEM.02769-05)  
1391 05

- 1392 Ranwez, V., Douzery, E.J.P., Cambon, C., Chantret, N., Delsuc, F., 2018. MACSE  
1393 v2: Toolkit for the Alignment of Coding Sequences Accounting for Frameshifts  
1394 and Stop Codons. *Mol. Biol. Evol.* 35, 2582–2584.  
1395 <https://doi.org/10.1093/molbev/msy159>
- 1396 Rawlings, N.D., Barrett, A.J., Thomas, P.D., Huang, X., Bateman, A., Finn, R.D.,  
1397 2018. The MEROPS database of proteolytic enzymes, their substrates and  
1398 inhibitors in 2017 and a comparison with peptidases in the PANTHER  
1399 database. *Nucleic Acids Res.* 46, D624–D632.  
1400 <https://doi.org/10.1093/nar/gkx1134>
- 1401 Ropars, J., Caron, T., Lo, Y.-C., Bennetot, B., Giraud, T., 2020a. La domestication  
1402 des champignons *Penicillium* du fromage. *C. R. Biol.* 343, 155–176.  
1403 <https://doi.org/10.5802/crbio.15>
- 1404 Ropars, J., de la Vega, R.C.R., Lopez-Villavicencio, M., Gouzy, J., Sallet, E., Dumas,  
1405 E., Lacoste, S., Debuchy, R., Dupont, J., Branca, A., Giraud, T., 2015.  
1406 Adaptive Horizontal Gene Transfers between Multiple Cheese-Associated  
1407 Fungi. *Curr. Biol.* 25, 2562–2569. <https://doi.org/10.1016/j.cub.2015.08.025>
- 1408 Ropars, J., Didiot, E., Rodríguez de la Vega, R.C., Bennetot, B., Coton, M., Poirier,  
1409 E., Coton, E., Snirc, A., Le Prieur, S., Giraud, T., 2020b. Domestication of the  
1410 Emblematic White Cheese-Making Fungus *Penicillium camemberti* and Its  
1411 Diversification into Two Varieties. *Curr. Biol.*  
1412 <https://doi.org/10.1016/j.cub.2020.08.082>
- 1413 Salmela, L., Rivals, E., 2014. LoRDEC: accurate and efficient long read error  
1414 correction. *Bioinformatics* 30, 3506–3514.  
1415 <https://doi.org/10.1093/bioinformatics/btu538>
- 1416 Stanke, M., Diekhans, M., Baertsch, R., Haussler, D., 2008. Using native and  
1417 syntenically mapped cDNA alignments to improve de novo gene finding.  
1418 *Bioinformatics* 24, 637–644. <https://doi.org/10.1093/bioinformatics/btn013>
- 1419 Steensels, J., Gallone, B., Verstrepen, K.J., 2021. Interspecific hybridization as a  
1420 driver of fungal evolution and adaptation. *Nat. Rev. Microbiol.* 1–16.  
1421 <https://doi.org/10.1038/s41579-021-00537-4>
- 1422 The UniProt Consortium, Bateman, A., Martin, M.-J., Orchard, S., Magrane, M.,  
1423 Agivetova, R., Ahmad, S., Alpi, E., Bowler-Barnett, E.H., Britto, R., Bursteinas,  
1424 B., Bye-A-Jee, H., Coetzee, R., Cukura, A., Da Silva, A., Denny, P., Dogan,  
1425 T., Ebenezer, T., Fan, J., Castro, L.G., Garmiri, P., Georghiou, G., Gonzales,  
1426 L., Hatton-Ellis, E., Hussein, A., Ignatchenko, A., Insana, G., Ishtiaq, R.,  
1427 Jokinen, P., Joshi, V., Jyothi, D., Lock, A., Lopez, R., Luciani, A., Luo, J.,  
1428 Lussi, Y., MacDougall, A., Madeira, F., Mahmoudy, M., Menchi, M., Mishra,  
1429 A., Moulang, K., Nightingale, A., Oliveira, C.S., Pundir, S., Qi, G., Raj, S.,  
1430 Rice, D., Lopez, M.R., Saidi, R., Sampson, J., Sawford, T., Speretta, E.,  
1431 Turner, E., Tyagi, N., Vasudev, P., Volynkin, V., Warner, K., Watkins, X.,  
1432 Zaru, R., Zellner, H., Bridge, A., Poux, S., Redaschi, N., Aimo, L., Argoud-  
1433 Puy, G., Auchincloss, A., Axelsen, K., Bansal, P., Baratin, D., Blatter, M.-C.,  
1434 Bolleman, J., Boutet, E., Breuza, L., Casals-Casas, C., de Castro, E.,  
1435 Echioukh, K.C., Coudert, E., Cuche, B., Doche, M., Dornevil, D., Estreicher,  
1436 A., Famiglietti, M.L., Feuermann, M., Gasteiger, E., Gehant, S., Gerritsen, V.,  
1437 Gos, A., Gruaz-Gumowski, N., Hinz, U., Hulo, C., Hyka-Nouspikel, N., Jungo,  
1438 F., Keller, G., Kerhornou, A., Lara, V., Le Mercier, P., Lieberherr, D.,  
1439 Lombardot, T., Martin, X., Masson, P., Morgat, A., Neto, T.B., Paesano, S.,  
1440 Pedruzzi, I., Pilbout, S., Pourcel, L., Pozzato, M., Pruess, M., Rivoire, C.,  
1441 Sigrist, C., Sonesson, K., Stutz, A., Sundaram, S., Tognolli, M., Verbregue, L.,

- 1442 Wu, C.H., Arighi, C.N., Arminski, L., Chen, C., Chen, Y., Garavelli, J.S.,  
1443 Huang, H., Laiho, K., McGarvey, P., Natale, D.A., Ross, K., Vinayaka, C.R.,  
1444 Wang, Q., Wang, Y., Yeh, L.-S., Zhang, J., Ruch, P., Teodoro, D., 2021.  
1445 UniProt: the universal protein knowledgebase in 2021. *Nucleic Acids Res.* 49,  
1446 D480–D489. <https://doi.org/10.1093/nar/gkaa1100>
- 1447 Thioulouse, J., Dray, S., Dufour, A.-B., Siberchicot, A., Jombart, T., Pavoine, S.,  
1448 2018. *Multivariate Analysis of Ecological Data with ade4*. Springer.  
1449 <https://doi.org/10.1007/978-1-4939-8850-1>
- 1450 Thorpe, R.S., Barlow, A., Malhotra, A., Surget-Groba, Y., 2015. Widespread parallel  
1451 population adaptation to climate variation across a radiation: implications for  
1452 adaptation to climate change. *Mol. Ecol.* 24, 1019–1030.  
1453 <https://doi.org/10.1111/mec.13093>
- 1454 Tinsley, C.R., Jacques, N., Lucas, M., Grondin, C., Legras, J.-L., Casaregola, S.,  
1455 2022. Molecular Genetic Analysis with Microsatellite-like Loci Reveals  
1456 Specific Dairy-Associated and Environmental Populations of the Yeast  
1457 *Geotrichum candidum*. *Microorganisms* 10, 103.  
1458 <https://doi.org/10.3390/microorganisms10010103>
- 1459 Urbach, G., 1997. The flavour of milk and dairy products: II. Cheese: contribution of  
1460 volatile compounds. *Int. J. Dairy Technol.* 50, 79–89.  
1461 <https://doi.org/10.1111/j.1471-0307.1997.tb01743.x>
- 1462 Vilgalys, R., Hester, M., 1990. Rapid genetic identification and mapping of  
1463 enzymatically amplified ribosomal DNA from several *Cryptococcus* species. *J.*  
1464 *Bacteriol.* 172, 4238–4246. <https://doi.org/10.1128/jb.172.8.4238-4246.1990>
- 1465 Walker, B.J., Abeel, T., Shea, T., Priest, M., Abouelliel, A., Sakthikumar, S., Cuomo,  
1466 C.A., Zeng, Q., Wortman, J., Young, S.K., Earl, A.M., 2014. Pilon: An  
1467 Integrated Tool for Comprehensive Microbial Variant Detection and Genome  
1468 Assembly Improvement. *PLoS ONE* 9, e112963.  
1469 <https://doi.org/10.1371/journal.pone.0112963>
- 1470 Warmuth, V., Eriksson, A., Bower, M.A., Cañon, J., Cothran, G., Distl, O., Glowatzki-  
1471 Mullis, M.-L., Hunt, H., Luís, C., do Mar Oom, M., Yupanqui, I.T., Ząbek, T.,  
1472 Manica, A., 2011. European Domestic Horses Originated in Two Holocene  
1473 Refugia. *PLoS ONE* 6, e18194. <https://doi.org/10.1371/journal.pone.0018194>
- 1474 Watterson, G.A., 1975. On the number of segregating sites in genetical models  
1475 without recombination. *Theor. Popul. Biol.* 7, 256–276.  
1476 [https://doi.org/10.1016/0040-5809\(75\)90020-9](https://doi.org/10.1016/0040-5809(75)90020-9)
- 1477 Wickham, H., 2016. Getting Started with ggplot2, in: Wickham, H. (Ed.), *Ggplot2:*  
1478 *Elegant Graphics for Data Analysis, Use R!* Springer International Publishing,  
1479 Cham, pp. 11–31. [https://doi.org/10.1007/978-3-319-24277-4\\_2](https://doi.org/10.1007/978-3-319-24277-4_2)
- 1480 Zhu, Q., Zheng, X., Luo, J., Gaut, B.S., Ge, S., 2007. Multilocus Analysis of  
1481 Nucleotide Variation of *Oryza sativa* and Its Wild Relatives: Severe Bottleneck  
1482 during Domestication of Rice. *Mol. Biol. Evol.* 24, 875–888.  
1483 <https://doi.org/10.1093/molbev/msm005>  
1484



## 1485 Figure legends

1486 Figure main:

1487 Figure 1: Phylogenetic relationships and population structure of 98 strains of  
1488 *Geotrichum candidum*, based on whole-genome data

1489 (A) Neighbor-net analysis based on a single nucleotide polymorphism (SNP)  
1490 distance matrix. The scale bar represents 0.01 substitutions per site for branch  
1491 lengths.

1492 (B) Genetic relationships among strains and population structure in *Geotrichum*  
1493 *candidum* based on 699,755 SNPs. a) Maximum likelihood tree showing genetic  
1494 relationships among the 98 isolates used in this study. All nodes are supported by  
1495 bootstrap support >98% (bootstrap analysis with 1000 resampled datasets). The  
1496 scale bar represents 0.05 substitutions per site for branch lengths. We used the  
1497 midpoint rooting method to root the tree. The “\$” symbol pinpoints commercial starter  
1498 strains and “\*” the PacBio sequences. Genomes used as reference are written in  
1499 bold. b) Population subdivision inferred for  $K = 5$ . Colored bars represent the  
1500 coefficients of membership in the five gene pools based on SNP data.

1501 (C) Principal component analysis (PCA) based on 699,755 SNPs and 98 strains.  
1502 Genetic clusters are represented by the same colors on all panels: light blue for  
1503 Cheese\_1, dark blue for Cheese\_2, pink for Cheese\_3, light grey for the mixed-  
1504 origin population and dark grey for the wild population. Borders of points were  
1505 colored in red when multiple points were overlapping due to clonal lineages (with a  
1506 threshold set at <90,000 SNP for defining clonal strains). The shape of points  
1507 represents the environment from which strains were sampled: circle for cheese/dairy,  
1508 square for food and triangle for wild environment.

1509 (D) PCA based on the 323,385 SNPs when the dataset was restricted to the 78  
1510 strains from the cheese clade

1511 Figure 2: Synteny of the beta lactamase-like genes lost in the cheese clade of  
1512 *Geotrichum candidum*

1513 Synteny of the scaffold QQZM01000080.1 of the LMA-244 (wild) assembly against  
1514 the scaffold CCBN010000010.1 of the cheese CLIB 918 (Cheese\_3) assembly. The  
1515 two scaffolds were shortened according to the range of nucleotide position on the  
1516 right of each sequence. Beta-lactamase-like genes are annotated in red while other

1517 genes are displayed in blue. Black triangles indicate positions where repeated  
1518 sequences were detected by tandem repeats finder (Benson, 1999). All strains from  
1519 the cheese clades and 5 from the mixed-origin populations (LMA-317, ESE00274,  
1520 MUCL8652 and ESE00540) carried the 20 kb deletion containing the g5112 and  
1521 g5113 genes, both encoding for beta-lactamase like.

1522 Figure 3: Heatmap of different repeats that expanded in the cheese populations  
1523

1524 From the repeat database based on the LMA 244 (wild) assembly, the copy number  
1525 of each repeated element was estimated by aligning illumina reads of each strain.  
1526 Only repeated elements that were at least in a 5-fold copy relative to the LMA 244  
1527 genome were kept on the heatmap. The total number of copies is written in the  
1528 center of each cell and filled with different shadings of grey to red depending on the  
1529 relative expansion from the smallest copy number for each type of repeat. The  
1530 maximum likelihood (ML) tree from the figure 1 (without admixed strains) was plotted  
1531 below strains name to highlight the population's delineation.

1532 Figure 4: Differences in growth, opacity and volatile compounds among the five  
1533 populations of *Geotrichum candidum*

1534 Each point represents a strain, horizontal dotted lines and vertical lines represent the  
1535 mean and the standard deviation of the phenotype in the population, respectively.  
1536 The number  $n$  at the bottom of plots indicates the number of strains used per  
1537 population for measuring the corresponding phenotypes. The pairwise Tukey tests  
1538 performed to assess whether there were mean differences between populations are  
1539 indicated with brackets and their p-values are given.

1540 (A) Mean radial growth of the three cheeses, mixed-origin and wild populations on  
1541 cheese (1% salt), yeast peptone dextrose (YPD) and minimal media at 25°C.

1542 (B) Differences in opacity between the three cheese populations, mixed-origin and  
1543 wild populations on cheese medium (1% salt) at 10°C. Integral opacity is defined as  
1544 the sum of the brightness values for all the pixels within the fungal colony bounds  
1545 and measures the whiteness and density of the mycelium.

1546 (C) Petri dish of a strain (ESE00182) from the Cheese\_2 population showing the  
1547 fluffiness of the colony

1548 (D) Principal component analysis (PCA) of *Geotrichum candidum* strains based on  
1549 their relative proportions of the different volatile compounds produced. Strains are

1550 plotted using the first two PCA axes.

1551 (E) Contribution of each volatile compound to the first two PCA axes. Compounds  
1552 contributing the most to the differentiation were colored in red and labeled (i.e., those  
1553 distant from 0 by an Euclidean distance  $\geq 0.1$ ).

1554 Figure 5: Competitive abilities of the different populations of *Geotrichum candidum*  
1555 against *Penicillium bifforme*, *P. roqueforti* and *Scopulariopsis asperula* challengers.

1556 (A) At the top, radial growth abilities of the competitors on lawns of *Geotrichum*  
1557 *candidum* belonging to different populations (the three cheese, the mixed-origin and  
1558 the wild populations). Each point represents a combination of the growth of a  
1559 competitor strain on a lawn of a *G. candidum* strain. Horizontal dotted lines and  
1560 vertical lines represent the mean and the standard deviation of the competitor growth  
1561 in the population, respectively. The number *n* at the bottom of plots indicates the  
1562 number of combinations of competitor-mat used per population. The competitor was  
1563 inoculated in a central point 24h later on a lawn of *G. candidum*. At the bottom, from  
1564 left to right, are shown pictures of *P. bifforme* ESE00023 on a *G. candidum*  
1565 ESE00186 lawn and without any lawn, *P. roqueforti* ESE00645 on a *G. candidum*  
1566 ESE00186 lawn and without any lawn, and *S. asperula* ESE01324 on a *G.*  
1567 *candidum* ESE00198 lawn and without any lawn, all on a salted cheese medium.

1568 B: At the top, radial growth abilities of competitors, with various *G. candidum* strains  
1569 belonging to different populations being grown on the other side of splitted Petri  
1570 dishes. The competitor was inoculated in a central spot on one side and the *G.*  
1571 *candidum* strain was spread on the other side of the splitted Petri dish (a picture is  
1572 shown as example below the figure). Media is not contiguous between the two sides  
1573 of Petri dishes, so that inhibition can only occur by volatile compounds. *Penicillium*  
1574 *bifforme* and *P. roqueforti* were grown for 11 days while *S. asperula* was grown for 19  
1575 days at 25°C.

1576 Each point represents a combination of the growth of a competitor strain on a *G.*  
1577 *candidum* strain. Horizontal dotted lines and vertical lines represent the mean and  
1578 the standard deviation of the competitor growth in the population, respectively. The  
1579 number *n* at the bottom of plots indicates the number of combinations of competitor-  
1580 mat used per population.

1581 Supplementary Figure:

1582 Figure S1: Population structure of *Geotrichum candidum*.

1583 Population subdivision inferred for  $K$  population ranging from two to six. Colored bars  
1584 represent the coefficients of membership in the  $K$  gene pools based on genomic  
1585 data. Each bar represents a strain, its name being indicated at the bottom of the  
1586 figure. The new color for each  $K$  increment is indicated on the right part. The  
1587 second order rate of change in the likelihood ( $\Delta K$ ) peaked at  $K=6$ . However  
1588 the additional population distinguished at  $K=6$  only encompassed two strains that  
1589 were not that differentiated in the splistree (MUCL 14462 and CBS 9194; ; FIGURE  
1590 1).

1591 Therefore, we chose to set the number of populations to five, the  $K$  value at which  
1592 the structure was the strongest and the clearest, with three cheese populations,  
1593 several admixed or hybrid cheese strains, a population of mixed origins and a wild  
1594 population. These populations are indicated on the last rows.

1595 Below the admixture plot, two rows are indicating milk from which the strains was  
1596 sampled and the population delineation.

1597 Figure S2: Pairwise identity between admixed and other strains, averaged by  
1598 population of *Geotrichum candidum*.

1599 In order to see traces of introgression from different populations of *Geotrichum*  
1600 *candidum* in some hybrid strains we computed the pairwise identity along the  
1601 genome. Only the first scaffold of the CLIB 918 genome is shown in this figure.  
1602 Values were averaged by population and when admixed strains had the same  
1603 genetic background (name of strains are above each subplot) across 30 kb  
1604 overlapping sliding windows with 5 kb steps. If no introgression happened, we expect  
1605 the admixed strain to be equally distant to the different populations along the  
1606 genome. Introgression results in genomic regions being atypically closer to a single  
1607 population. All admixed strains within the cheese clades had introgression imprints  
1608 while the other three strains (CBS 9194<sup>T</sup>, MUCL 14462 and ESE01080) did not,  
1609 meaning that they were either from different genetic backgrounds or introgressed  
1610 with genetic backgrounds different from the five populations of *G. candidum*.

1611 Figure S3: Linkage disequilibrium against distance between SNPs for the five  
1612 *Geotrichum candidum* populations.

1613 The  $r^2$  (square of the correlation coefficient between two indicator variables) varies

1614 between 0 when two markers are in perfect equilibrium and 1 when they provide  
1615 identical information. Under recombination, we expect  $r^2$  to decrease exponentially  
1616 with the distance between two SNP while in non recombining lineages linkage  
1617 disequilibrium remains flat. All *Geotrichum candidum* populations  $r^2$  decay curve  
1618 behaved as recombining populations except the Cheese\_2 population.

1619 Figure S4: SNPs inducing a premature stop codon for each *Geotrichum candidum*  
1620 strain.

1621 In order to keep genes that carried a single nucleotide polymorphism (SNP) inducing  
1622 a premature STOP codon in most of a population, we only showed STOP-inducing  
1623 SNP that were at least in more than three strains. Columns represent strains and  
1624 strains are ordered following the maximum likelihood (ML) tree. Cells are colored in  
1625 black when the corresponding SNP induces a premature stop codon, white when  
1626 there is no substitution for this site compared to the reference genome and grey  
1627 when the SNP status could not be attributed during SNP calling, substitution that  
1628 induces other effects on the protein sequence were not present in this subset of  
1629 STOP-inducing sites. Each row is a site, when multiple SNPs induced stop codons in  
1630 the same gene, the corresponding rows were grouped and separated from other  
1631 genes by black lines. The analysis was done using either the CLIB 918 (Cheese\_3)  
1632 genome (A) or the LMA-244 (Wild) genome (B) as a reference.

1633

1634 Figure S5: Density of transposable elements copy number relative to the LMA-244  
1635 strain

1636 To better show the fat tail distribution, the y-axis (density) was cut at 25%. A red  
1637 dashed line indicates the threshold of five times more copy number than the LMA-  
1638 244 strain. This threshold was set to identify repeats expansion related to small  
1639 peaks on the density curve

1640 Figure S6: Distribution of absolute divergence  $d_{xy}$  values for different pairwise  
1641 populations tested.

1642 Distribution of absolute divergence ( $d_{xy}$ ) values for each pairwise population  
1643 comparison from the genomic scan analysis. Density is given as an overlapping  
1644 window number for a specific value of  $d_{xy}$ , each window being 7.5 kb wide with a step  
1645 of 5 kb (optimal values based on variants densities). A black vertical line indicates  
1646 the threshold of 1% highest values kept for the enrichment test.

1647 Figure S7: Genomic scan of within-population genetic diversity and between-  
1648 population differentiation in *Geotrichum candidum*.

1649 Genomic of the nucleotide diversity  $\pi$ , watterson's theta  $\theta_w$ , absolute divergence  $d_{xy}$   
1650 and fixation index  $F_{ST}$  (Hudson et al., 1992) along the scaffold 1 of the CLIB 918  
1651 reference genome. At the bottom a guide indicates genic regions in black and non  
1652 genic regions in white. 7.5 kb overlapping windows with a step of 5 kb (optimal  
1653 values based on variant densities). On the bottom of the figure, genic regions are  
1654 shown in black (not positively selected) or red (positively selected in the MK test  
1655 analysis) rectangle. On the first panel (nucleotide diversity  $\pi$ ), 5% lowest  $\pi$  values in  
1656 the three cheese populations were highlighted by black dots. On the third panel  
1657 (absolute divergence  $d_{xy}$ ), 1% highest values of  $d_{xy}$  of each pairwise comparison  
1658 were highlighted by back dots. These outliers were checked for gene presence and  
1659 functions that could be involved in cheese adaptation and subsequently tested for  
1660 enrichment within this subset of outliers compared to the whole genome

1661 Figure S8: Differences in growth among the five populations of *Geotrichum*  
1662 *candidum* populations for different media and temperature

1663 Mean radial growth of the three cheese populations, mixed-origin and wild  
1664 populations on cheese (1% salt), yeast peptone dextrose (YPD) and minimal media  
1665 at 10, 15 and 25°C for 7, 11 and 14 days.

1666 Each point represents a strain, horizontal dotted lines and vertical lines represent the  
1667 mean and the standard deviation of the population respectively. The number  $n$  at the  
1668 bottom of plots indicates the number of strains per population used for measuring  
1669 these phenotypes. To assess difference in means between populations, significant  
1670 pairwise Tukey tests are indicated with brackets and p-values.

1671 Figure S9: Differences in lipolytic and proteolytic activity among the five populations  
1672 of *Geotrichum candidum* populations for different growing time and temperature

1673 A: Lipolytic activity of *Geotrichum candidum* at 15 and 25°C and grown for 7, 14 and  
1674 21 days.

1675 B: Proteolytic activity of *G. candidum* at 15 and 25°C and grown for 7, 14 and 21  
1676 days.

1677 Each point represents a strain, horizontal dotted lines and vertical lines represent the  
1678 mean and the standard deviation of the population respectively. The number  $n$  at the  
1679 bottom of plots indicates the number of strains per population used for measuring  
1680 these phenotypes. To assess difference in means between populations, significant

1681 pairwise Tukey tests are indicated with brackets and p-values. Length of lysis was  
1682 measured as a radius between the center of the colony and the limit of the lysis area  
1683 when lysis happened under the colony or measured as the thickness of the lysis  
1684 area when there was no lysis under the colony.

1685 Figure S10: Differences in salt tolerance, growth on different milk and volatile  
1686 compounds in detail among the five populations of *Geotrichum candidum*.

1687 Each point represents a strain, horizontal dotted lines and vertical lines represent the  
1688 mean and the standard deviation of the phenotype in the population, respectively.  
1689 The number  $n$  at the bottom of plots indicates the number of strains used per  
1690 population for measuring the corresponding phenotypes. The pairwise Tukey tests  
1691 performed to assess whether there were mean differences between populations are  
1692 indicated with brackets and their p-values are given.

1693 (A) Mean radial growth at 10°C of the three cheese, mixed-origin and wild  
1694 populations of *Geotrichum candidum* on cheese agar medium with different salt  
1695 concentrations: unsalted, 1% salt for mimicking St Nectaire and cream cheeses, 2%  
1696 salt for mimicking Camembert and goat cheeses and 4% salt for mimicking blue  
1697 cheeses.

1698 (B) Mean radial growth at 10°C of the three cheese populations, the mixed-origin and  
1699 the wild populations on yogurt agar media made with raw cow, goat and sheep milks.

1700 (C) Relative proportions of major volatile compounds in Cheese\_1, Cheese\_3,  
1701 mixed-origin or wild populations of *G. candidum*. The volatile compounds shown  
1702 were those contributing the most to the two first PCA axes or that are important for  
1703 cheese ripening. For each compound, the related corresponding descriptor from  
1704 [thegoodscentscompany.com](https://thegoodscentscompany.com) was added.

1705

1706

1707 Supplementary Table:

1708 Table S1: Description of the origin, phylogenetic assignment, sequencing statistics,  
1709 and phenotype tested of *Geotrichum candidum* strains used in this study.

1710 Strains: Name of the strains; ESE collection number: collection number of strains  
1711 kept at the author laboratory; Population: population attributed to the strains in this  
1712 study; Clonal group: strains with the same number are clonal (less than 1,200 SNP  
1713 between them); Species name: species identified either based on public collection or  
1714 from ITS identification for collected strains in this study; Environment of sampling  
1715 simplified: broader categories for source of sampling; Milk type: if extracted from  
1716 dairy, indicates species from which was made the dairy; Location: Region or country  
1717 of origin; Mating type: mating type identified in *Geotrichum candidum* either MATA or  
1718 MATB (Morel et al., 2015).

1719 Table S2: Population genetics statistics estimating genetic differentiation ( $F_{st}$ ,  $d_{xy}$ ) in  
1720 the five *Geotrichum candidum* populations and among the identified population  
1721 within each of two other fungal species (*Penicillium camemberti* and *Penicillium*  
1722 *roqueforti*) (Dumas et al., 2020; Ropars et al., 2020b)

1723 Table of  $F_{st}$  (fixation index) and  $d_{xy}$  (absolute divergence) (Hudson et al., 1992; Nei  
1724 and Li, 1979). Values for *Geotrichum candidum*, *Penicillium roqueforti* (Dumas et al.,  
1725 2020), *Penicillium camemberti* (Ropars et al., 2020b) are indicated for each  
1726 population. Cells are colored from the lowest (white) and the highest (red) value of  
1727 each indices.

1728 Table S3: Proportions of fixed, shared and private SNPs for each pair of populations  
1729 of *Geotrichum candidum* population and for each pair of populations within each of  
1730 two other fungal species (*Penicillium camemberti* and *Penicillium roqueforti*) (Dumas  
1731 et al., 2020; Ropars et al., 2020b).

1732 Percent and number of fixed, shared or private single nucleotide polymorphisms  
1733 (SNPs) for *Geotrichum candidum*, *Penicillium roqueforti* (Dumas et al., 2020),  
1734 *Penicillium camemberti* (Ropars et al., 2020b) are indicated for each populations.  
1735 The method of attributions of SNPs to different categories are available on  
1736 [https://github.com/BastienBennetot/fixed\\_shared\\_private\\_count](https://github.com/BastienBennetot/fixed_shared_private_count).



1737 Table S4: F3 test performed on each trio of populations of *Geotrichum candidum*  
1738 populations.

1739 The F3 test is a test between three populations. It tests whether a target population  
1740 (C) is admixed between two source populations (A and B) and gives a measure of  
1741 shared drift between two test populations (A and B) from an outgroup (C). In case of  
1742 introgression, we expect negative F3 values. A Z-score is computed based on F3  
1743 value and the standard error to assess the deviation from zero of the F3 value. If the  
1744 Z-score is inferior to minus three then we can conclude a significant rejection of the  
1745 Null hypothesis (F3 value is not negative).

1746

1747

1748 Table S5: Population genetics statistics estimating genetic diversity ( $\pi$ , watterson's  
1749  $\theta$ ) in the five *Geotrichum candidum* populations and among the identified population  
1750 of three other fungal species (*Penicillium roqueforti*, *Penicillium camemberti* and  
1751 *Saccharomyces cerevisiae*) (Dumas et al., 2020; Peter et al., 2018; Ropars et al.,  
1752 2020b).

1753 Nucleotide diversity statistics ( $\pi$  and watterson's  $\theta$ ) are indicated for *Geotrichum*  
1754 *candidum*, *Penicillium roqueforti* (Dumas et al., 2020), *Penicillium camemberti*  
1755 (Ropars et al., 2020b) and *Saccharomyces cerevisiae* (Peter et al., 2018). Cells are  
1756 colored from the lowest (white) and the highest (red) value of each indices.

1757 Table S6: Distribution of the two mating types in each population and proportion test  
1758 of the deviation from 1:1 ratio.

1759 Table S7: Phi test of each population of *Geotrichum candidum* using the first scaffold  
1760 of CLIB 918 assembly.

1761 Pairwise homoplasy index (PHI) test helps to discriminate between the presence or  
1762 absence of recombination between a population (Bruen et al., 2006). It tests with  
1763 permutations the null hypothesis of no recombination by looking at the genealogical  
1764 association among adjacent sites. The PHI test was performed using PhiPack v1.1  
1765 and the first scaffold of the CLIB 918 assembly as reference.

1766 Table S8: Number and percentage of SNPs classified by impact, functional class,  
1767 effect and genomic regions for each *Geotrichum candidum* populations.

1768 Based on the 7,150 CDS of the CLIB 918 assembly, the effect of all variants was  
1769 assessed. Each variant is categorized in different functional effects on the protein

1770 sequence. Results are meaned by population and shown either as the mean number  
1771 of SNP or percentage. Results were computed using snpeff (Cingolani et al., 2012).  
1772 (A) Total number of single nucleotide polymorphism (SNP) within each *G. candidum*  
1773 populations.  
1774 (B) Putative variant impact prediction. Different impacts categories are defined in  
1775 Snpeff manual in 'Input & output files' section  
1776 (C) Protein sequence effect of SNPs. Variants can either not change amino acid  
1777 sequence (silent), change the amino acid (missense) or induce stop codons  
1778 (nonsense)  
1779 (D) Functional effect of SNPs defined in Snpeff manual in 'Input & output files'  
1780 section  
1781 (E) Position of the SNPs compared to genes

1782 Table S9: Number of copy number variants windows that differentiated *Geotrichum*  
1783 *candidum* populations and test for enrichment of gene ontologies contained within  
1784 these windows.

1785 Copy number windows (non-overlapping windows of 500 bp) were subsetted and  
1786 classified in three comparison when the median copy number between the two  
1787 clades compared was different: wild against all other populations (mixed origin and  
1788 cheese populations), mixed-origin against cheese clade, and any pairwise difference  
1789 within the different cheese populations (subtable A and B). For each comparison,  
1790 when subsetted windows contained genes, gene ontologies (GO) of these genes  
1791 were used to perform an enrichment test compared to the rest of the genome  
1792 (subtable C and D). The same methodology was used for LMA 244 (Wild) or CLIB  
1793 918 (Cheese\_3) as reference assembly ensuring we see regions unique to the  
1794 Cheese\_3 and the Wild populations.

1795 (A) Number of windows subsetted in each clade comparison using LMA 244  
1796 assembly as reference

1797 (B) Number of windows subsetted in each clade comparison using CLIB 918  
1798 assembly as reference

1799 (C) Enrichment test on gene ontologies (GO) present within the subsets of windows  
1800 in each clade comparison using CLIB 918 assembly as reference

1801 (D) Enrichment test on gene ontologies (GO) present within the subsets of windows  
1802 in each clade comparison using LMA 244 assembly as reference

1803 Table S10: Repeat copy number for the different strains of *Geotrichum candidum*.

1804 In order to de novo detect repeats within *Geotrichum candidum*, RepeatModeler  
1805 v2.0.2 (Flynn et al., 2020) was run on the pacbio genome assembly of LMA 244  
1806 generating a library of 176 repeats. The repeat redundancy was reduced using cd-  
1807 hit-est, as described in Goubert et al., giving a final library of 108 repeats (presented  
1808 in column “Clustering of repeat family”) (Goubert et al., 2022). Sometimes the type  
1809 and family of these repeats was inferred (column type of repeat and repeat family).  
1810 To estimate the per strain copy number of each repeat, illumina reads were aligned  
1811 using bwa mem (v0.7.17; Li, 2013) to the repeat library and the median coverage for  
1812 each repeat was then normalized by the LMA 244 genome wide median coverage.  
1813 Strain: name of the strains studied; relative median coverage: Coverage of all  
1814 genomic reads mapped to the repeated sequence normalized by genome wide  
1815 coverage before taking the median of all nucleotides of the repeated sequence  
1816 (gives an idea of the copy number of the repeated element genome-wide); Copy  
1817 number relative to LMA-244 strains: relative median coverage of the strain divided by  
1818 the one of LMA-244 (Wild) strain to better emphasize repeat expansion within the  
1819 cheese clade.

1820

1821 Table S11: Test for enrichment of gene functions that showed footprints of divergent  
1822 selection and recent selective sweeps.

1823 We tested gene function enrichment that were detected either by keeping 1%  
1824 highest of absolute divergence ( $d_{xy}$ ) between cheese and wild strains (A) or 5%  
1825 lowest nucleotide diversity ( $\pi$ ) in the cheese populations but not in the wild  
1826 population (B). Only functions related to lactose, lipid, protease were kept. Windows  
1827 were 7.5 kb wide and overlapping windows with a step of 5 kb.

1828 (A) Test for enrichment of gene functions within the 1% highest Dxy windows when  
1829 comparing a cheese population to the Wild population

1830 The subsetted windows for each test are based on the 1% highest Dxy windows for  
1831 a specific comparison between a cheese and the wild population

1832 (B) Test for enrichment of gene functions within the 5% lowest Pi windows in cheese  
1833 populations. Windows are excluded when they are also in the 5% lowest Pi of the  
1834 wild population.

1835 The subsetted windows for each test are based on the 5% lowest Pi windows for a  
1836 specific cheese population.

1837

1838

1839 Table S12: Results of the McDonald and Kreitman (MK) test for positive selection.  
1840 Genes evolving under positive selection were assessed using McDonald and  
1841 Kreitman (MK) tests. Using contrasting levels of polymorphism and divergence at  
1842 neutral and functional sites, MK test estimates the fraction of substitutions at the  
1843 functional sites that were driven by positive selection. When fisher.P.value was lower  
1844 than 0.05, we considered that the gene was under positive selection. Only genes  
1845 under positive selection were shown in the table. The mixed-origin population was  
1846 compared to the cheese clade (A), Cheese\_1 (B), Cheese\_2 (C) and Cheese\_3 (D).  
1847 Ortho\_id: identifier of the orthologous gene; P1\_nonsyn: the number of non-  
1848 synonymous polymorphisms in the first population; P2\_nonsyn: the number of non-  
1849 synonymous polymorphisms in the second population; P1\_syn: the number of  
1850 synonymous polymorphisms in the first population; P2\_syn: the number of  
1851 synonymous polymorphisms in the second population; D\_nonsyn: the number of  
1852 non-synonymous substitutions; D\_syn: the number of synonymous substitutions;  
1853 neutrality.index: quantifies the degree of departure from neutrality; alpha: the  
1854 proportion of substitutions driven by positive selection; fisher.P.value: P-value of the  
1855 MK test; GeneID: gene identifier in the CLIB 918 assembly annotation; Contig Start:  
1856 Start of the gene sequence; Stop: Stop of the gene sequence; Name: Name of the  
1857 closest orthologous annotated genes; Product: Function of the protein; PFAM: pfam  
1858 database annotation; InterPro: InterPro database annotation

1859  
1860  
1861

1862 Table S13: Anova table of all phenotypic linear models and post-hoc test table.  
1863 All outputs of analysis of variance (ANOVA) (A) and post-hoc test (B) based on  
1864 different linear models that were used for phenotypic analyses. Linear models tested:  
1865 Effect of media, temperature on radial growth (1); effect of media and population on  
1866 radial growth of *Geotrichum candidum* at 25°C (2); effect of salt content and  
1867 population on radial growth (3); effect of milk origin and population on radial growth  
1868 (4); effect of media and population on opacity (5); effect of population of *Geotrichum*  
1869 *candidum* on competitor growth (6); competition abilities by volatiles on splitted Petri  
1870 dishes (7); effect of population on relative proportions of volatile compounds (8).

1871 In ANOVA table, columns correspond to degree of freedom (Df), sum of squares  
1872 (Sum Sq), mean square (Mean Sq), the F statistic (value) and the p-value of this  
1873 test.

1874 Columns in post-hoc tables before the “term column” gives the condition kept for  
1875 each single test. term: variable used for pairwise comparison; group1: the group that  
1876 we compare against group2; group2: a second group that we compare to group1;  
1877 null.value: value of group1 - group2 under the null.hypothesis; estimate: value of  
1878 group1 - group2 using the data; conf.low: Lower value of the confidence interval;  
1879 conf.high: higher value of the confidence interval; p.adj: adjusted p-value; p.ad.signif:  
1880 significance of the adjusted p-value (p-value >0.05:n.s.; <0.05:\*; <0.01:\*\*; <0.001:\*\*\*,  
1881 <1E-04:\*\*\*\*). Post hoc test for testing the effect of salt content and population on  
1882 radial growth of *G. candidum*.

1883

1884 Table S14: Anova table and post-hoc test of lipolysis and proteolysis analyses.

1885 All outputs of analysis of variance (ANOVA) (A) and post-hoc test (B) based on  
1886 different linear models that were used for lipolysis (1) and proteolysis (2) analyses.  
1887 Radius of lysis for lipolytic and proteolytic activities experiments was often discrete,  
1888 strains either showing lytic activity or not at all. Thus, data were transformed into  
1889 qualitative discrete data and a generalized linear model with a binomial function as  
1890 logit was fitted. No post-hoc tests were computed for the lipolysis analysis because  
1891 there was no population effect.

1892 In ANOVA table we find columns  $\sigma^2$ : mean random effect variance of the model;  $\tau^2$ :  
1893 The random intercept variance of a given variable, or between-subject variance; ICC:  
1894 the intraclass correlation coefficient; N variable: the number of categories of the  
1895 given variable; Observations: sample size of the model; marginal  $R^2$  : represents the  
1896 variance explained by the fixed effects; conditional  $R^2$ : interpreted as the variance  
1897 explained by the entire model (i.e. the fixed and random effects).

1898 In post hoc table we find columns Linear Hypotheses: null hypothesis considered for  
1899 each post-hoc test; Estimate: Measured value; Std. Error: standard error of this  
1900 measure; z value: Z statistic of this test.

1901 Table S15: Description of the origin and species of strains used in the competition  
1902 experiments.  
1903 ESE collection number: Author collection number for this strain; Previous name in  
1904 public collection: name of the strain in other public collection; Species: Species of the  
1905 strain; Origin of sampling: Environment of sampling for this strain; Milk (if cheese):  
1906 species from which was collected the milk that was used to make the dairy where the  
1907 strain was sample; Location of sampling; Location of the sampling; Cheese shop:  
1908 where the cheese was bought for cheese strains; Information on sampling date:  
1909 Sampling date when known for strains sampled years before the study

Figure 1: Phylogenetic relationships and population structure of 98 strains of *Geotrichum candidum*, based on whole-genome data

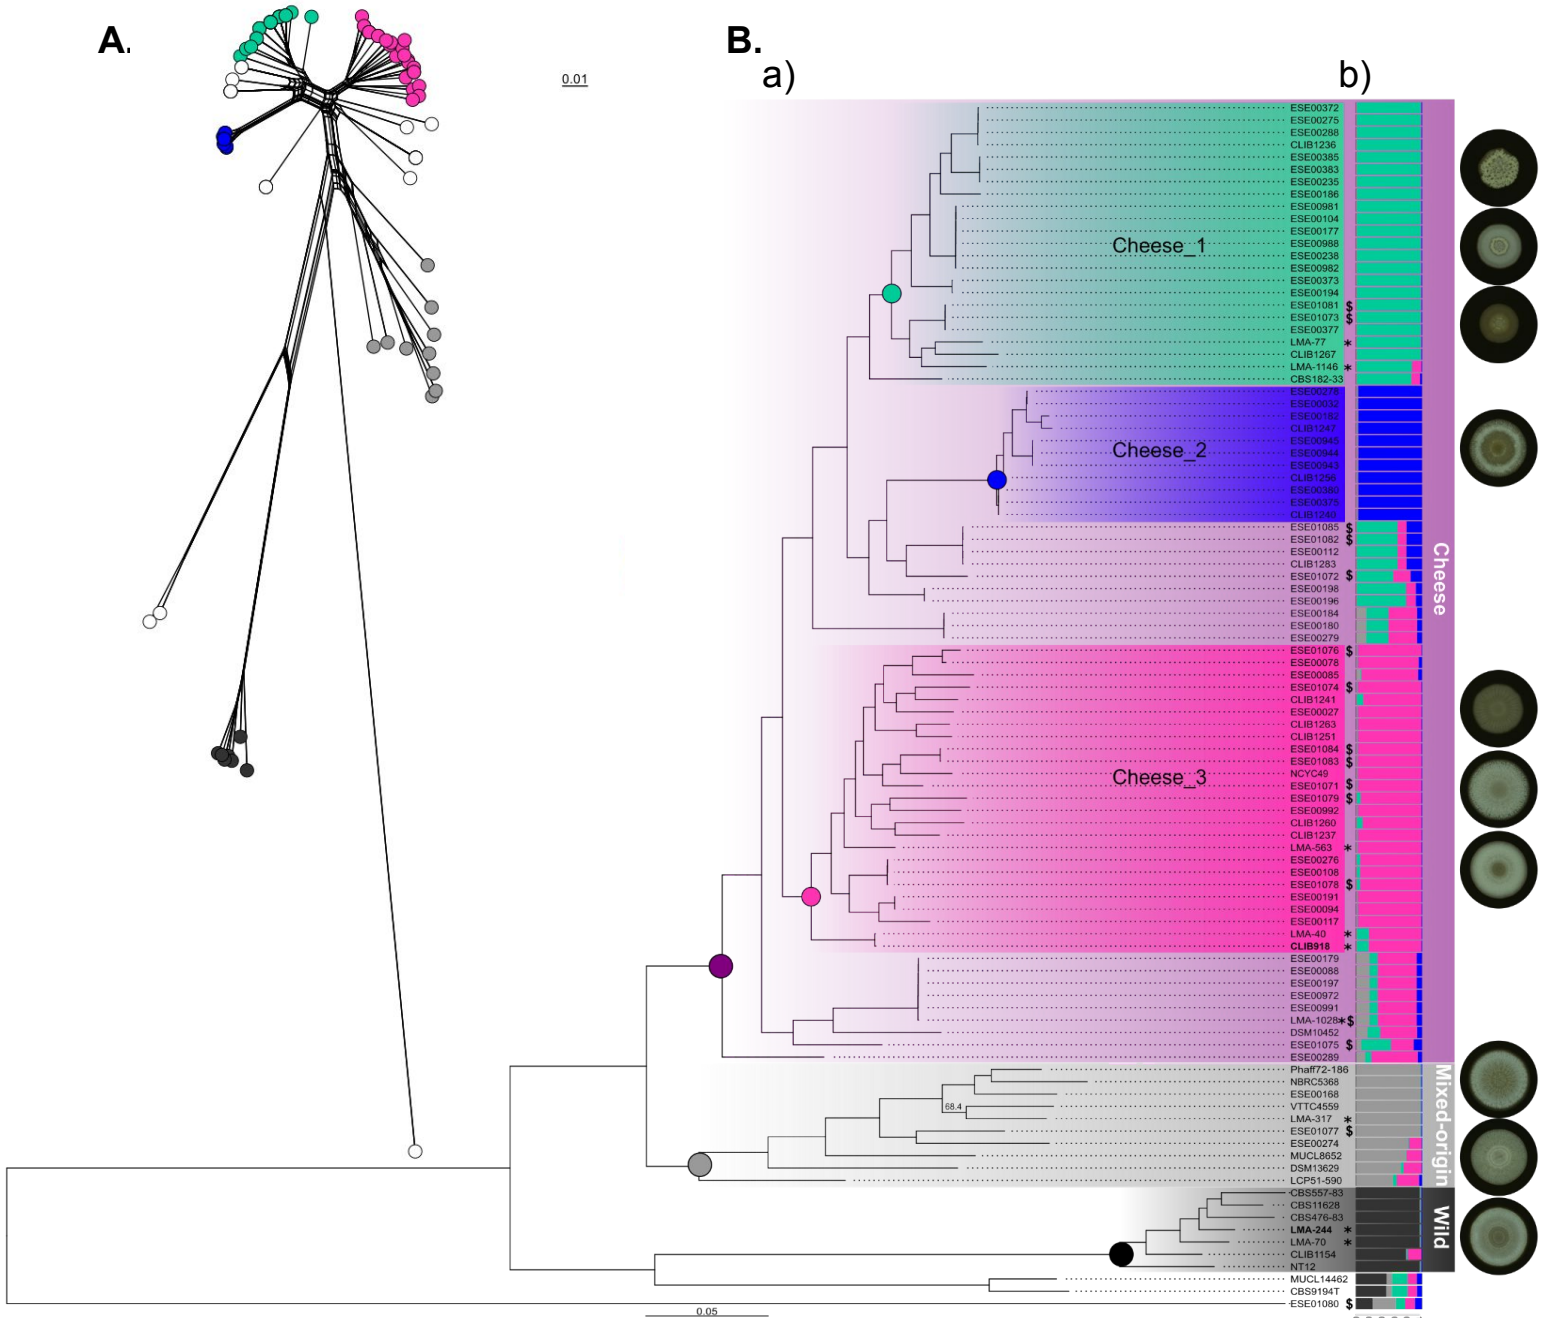

**C.**

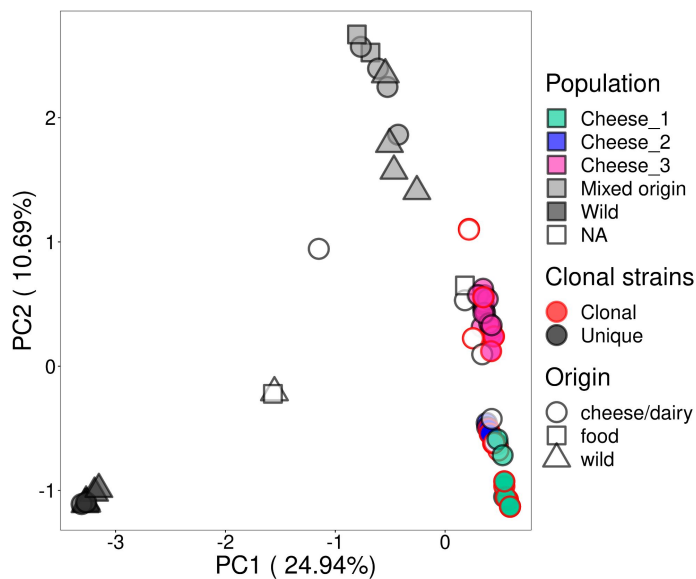

**D.**

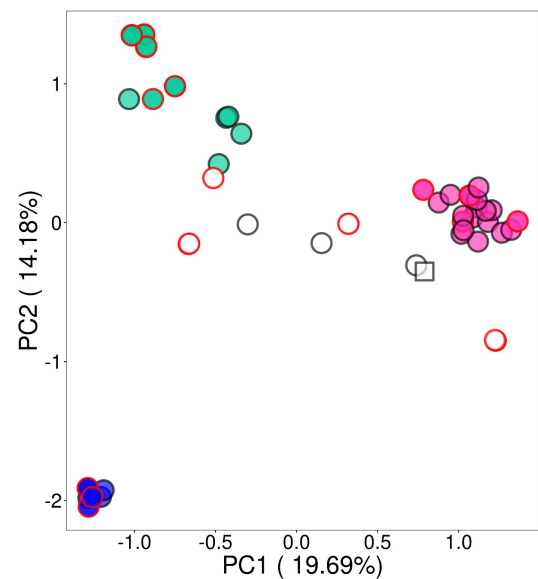

Figure 2: Synteny of the beta lactamase-like genes lost in the cheese clade of *G. candidum*

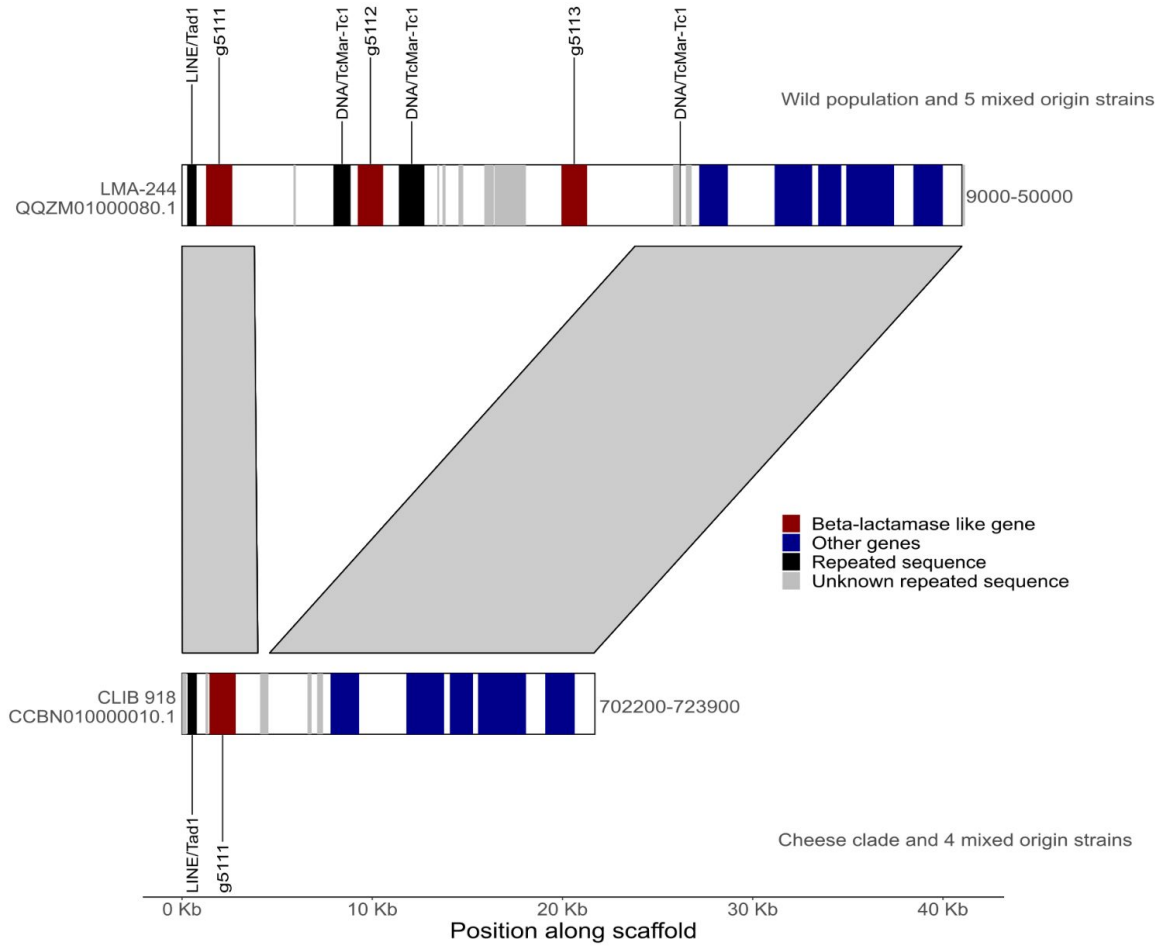

Figure 3: Heatmap of different repeats that expanded in the cheese populations

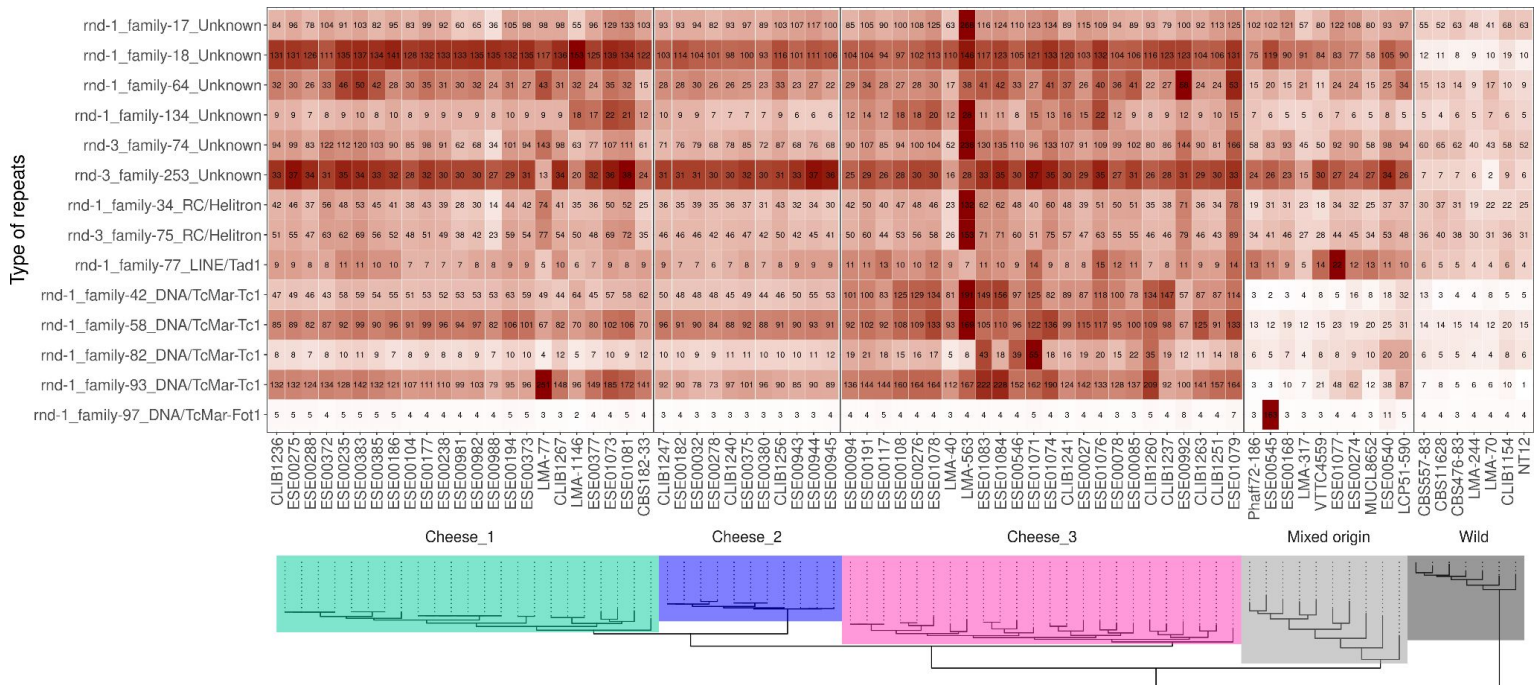



Figure 4: Differences in growth, opacity and volatile compounds among the five populations of *Geotrichum candidum*

**A.**

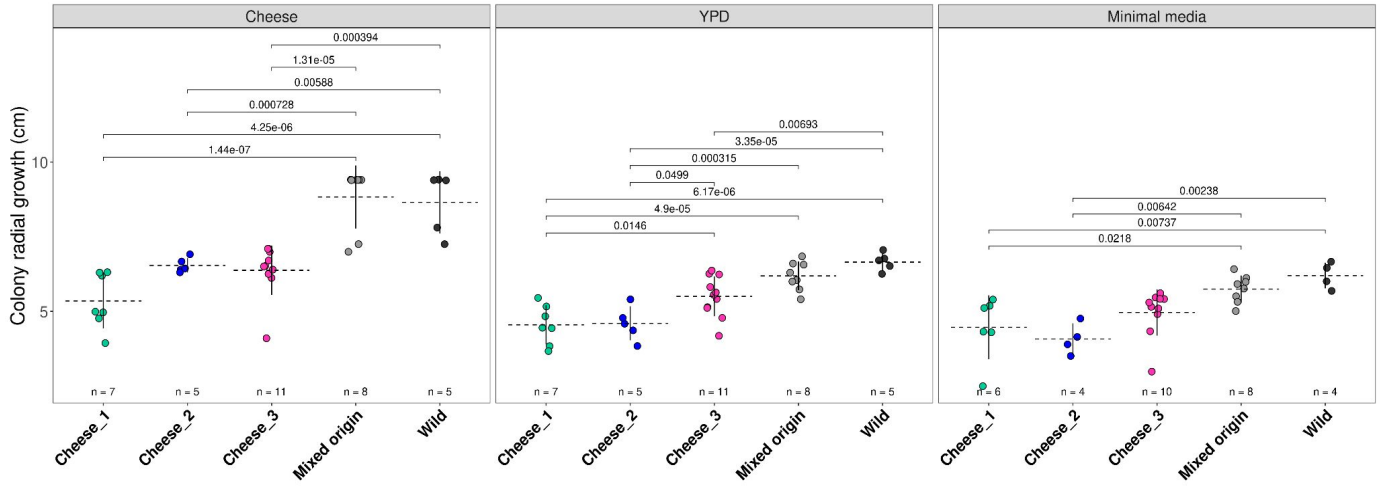

**B.**

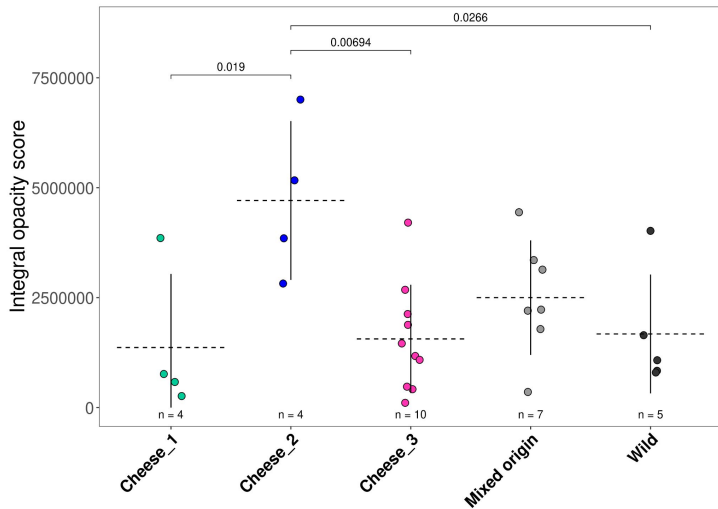

**C.**

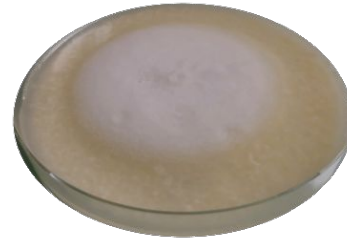

**D.**

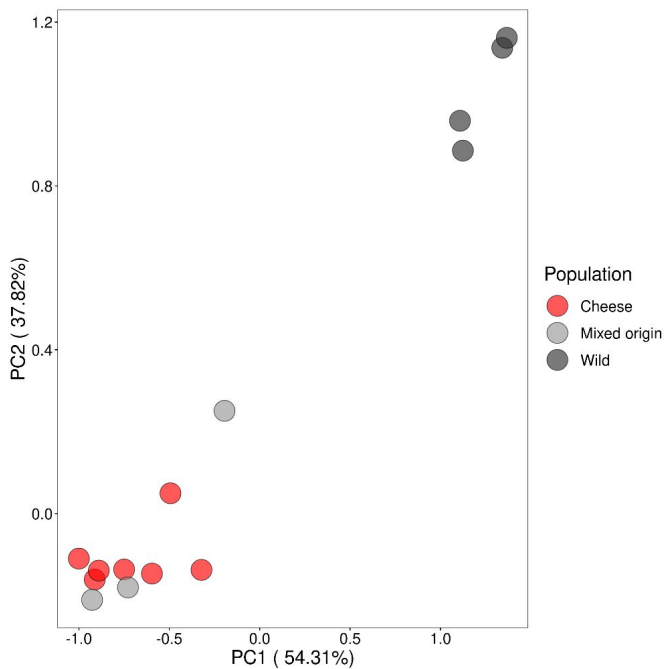

**E.**

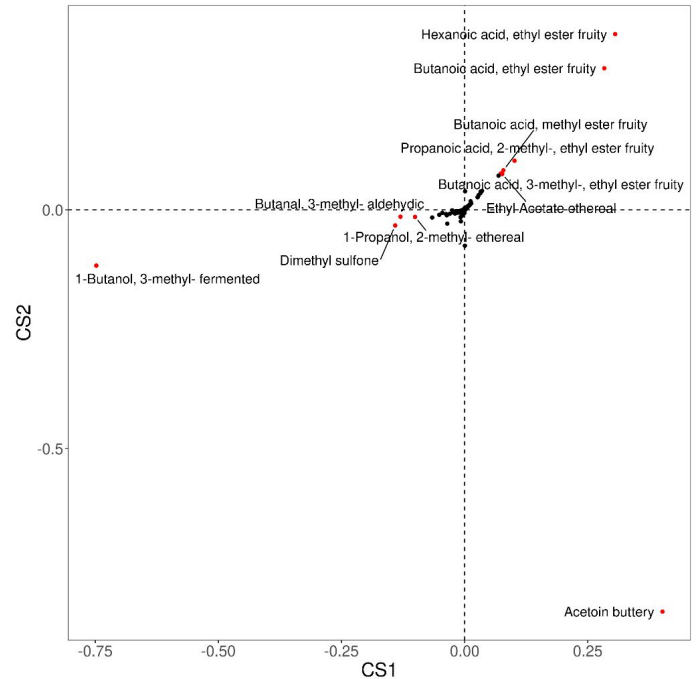

Figure 5: Competitive abilities of the different populations of *G. candidum* against *Penicillium biforme*, *P. roqueforti* and *Scopulariopsis asperula* challengers.

A.

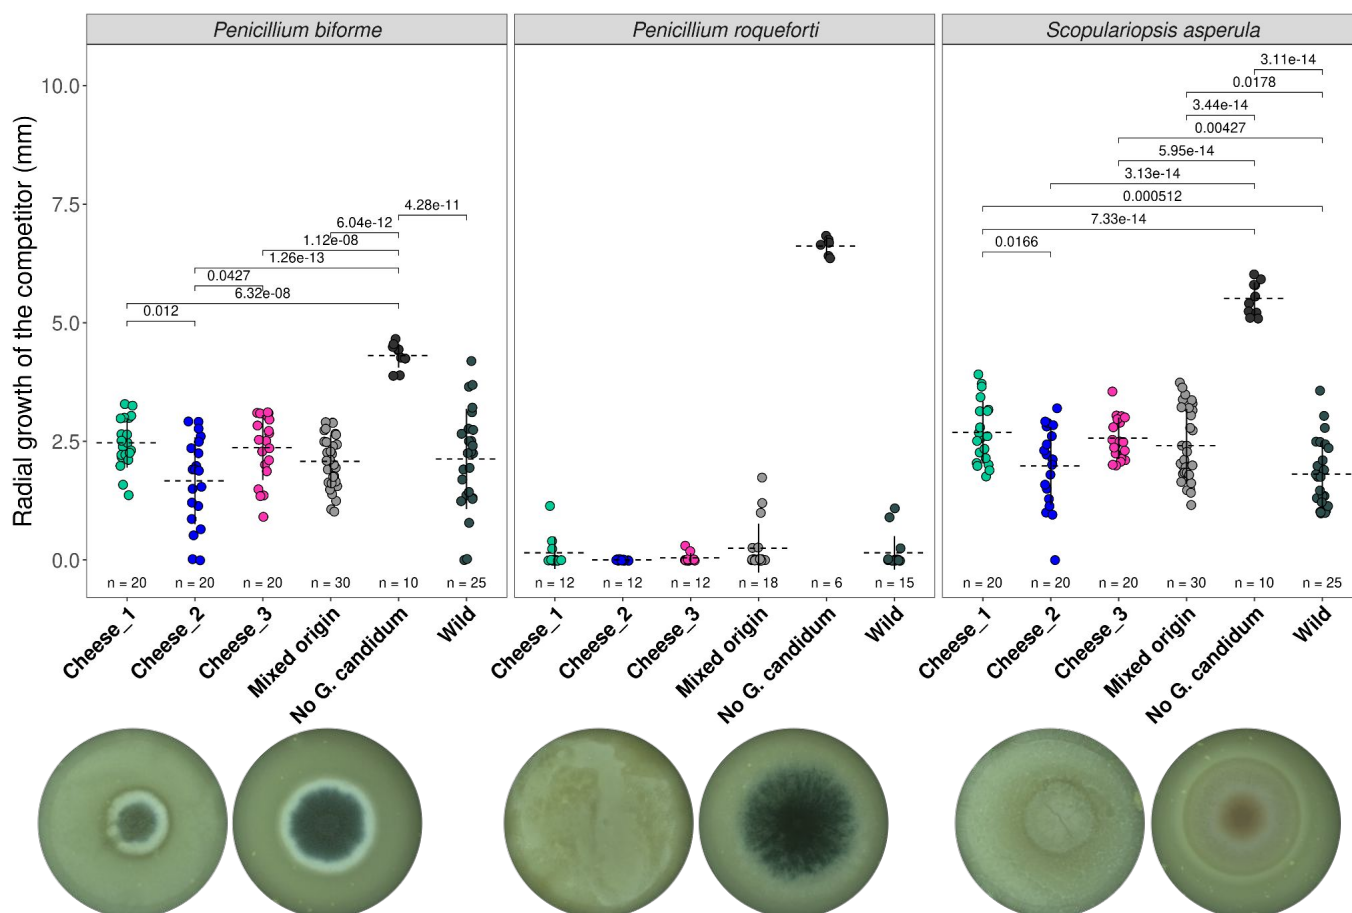

B.

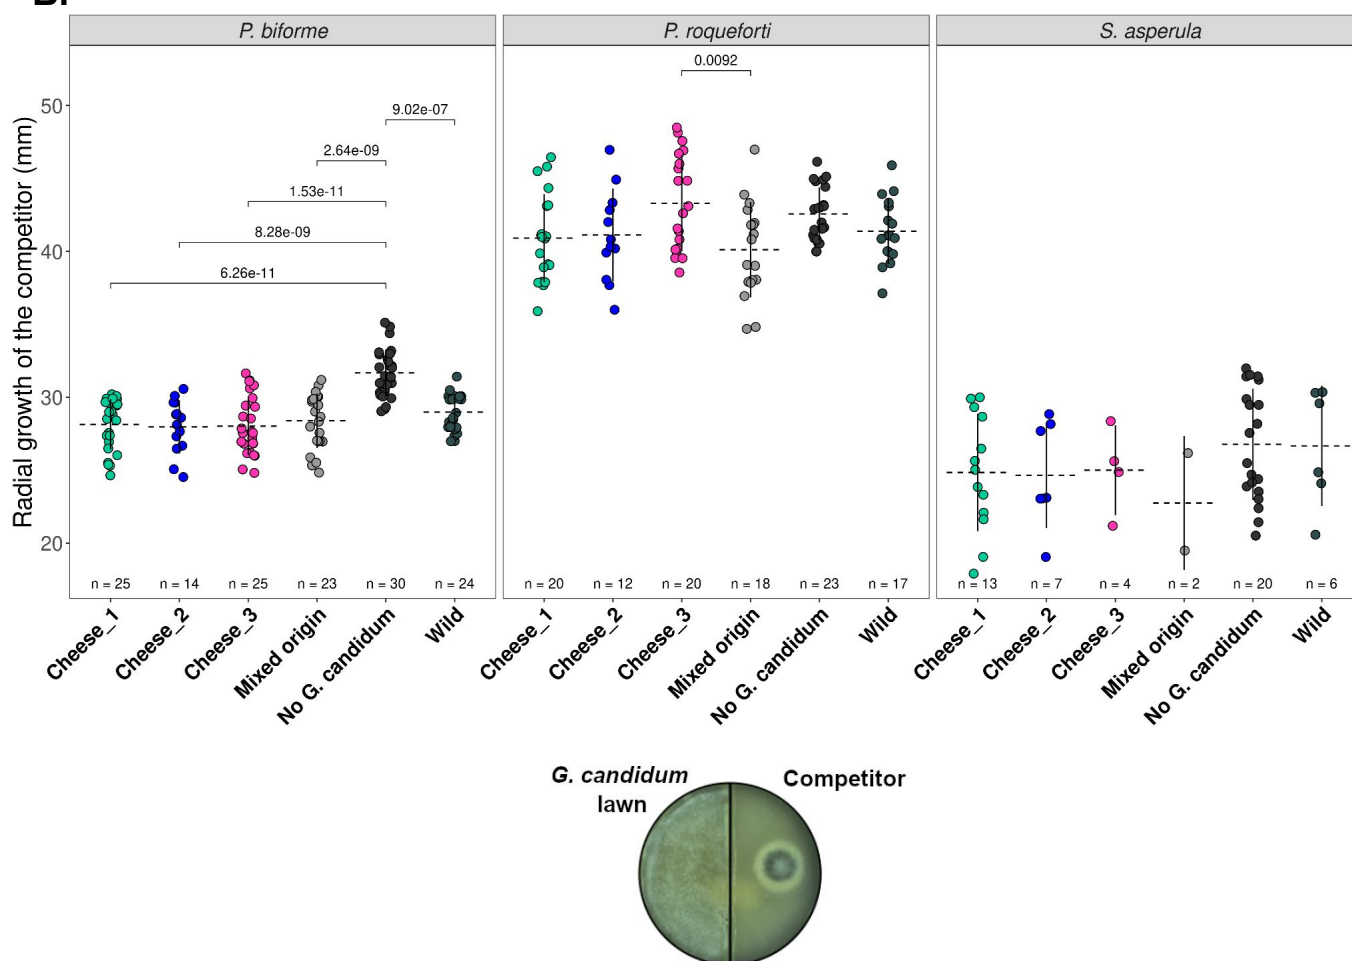

Source: https://www.biorxiv.org/content/10.1101/2022.05.17.492043v3.full.pdf
